# Age- or lifestyle-induced accumulation of genotoxicity is associated with a generalized shutdown of long gene transcription

Olga Ibañez-Solé<sup>1</sup>, Ander Izeta<sup>1,2\*</sup>

<sup>1</sup> Biodonostia Health Research Institute, Tissue Engineering Group, Donostia-San Sebastián, Spain

<sup>2</sup> Tecnun-University of Navarra, Donostia-San Sebastián, Spain.

\* [ander.izeta@biodonostia.org](mailto:ander.izeta@biodonostia.org)

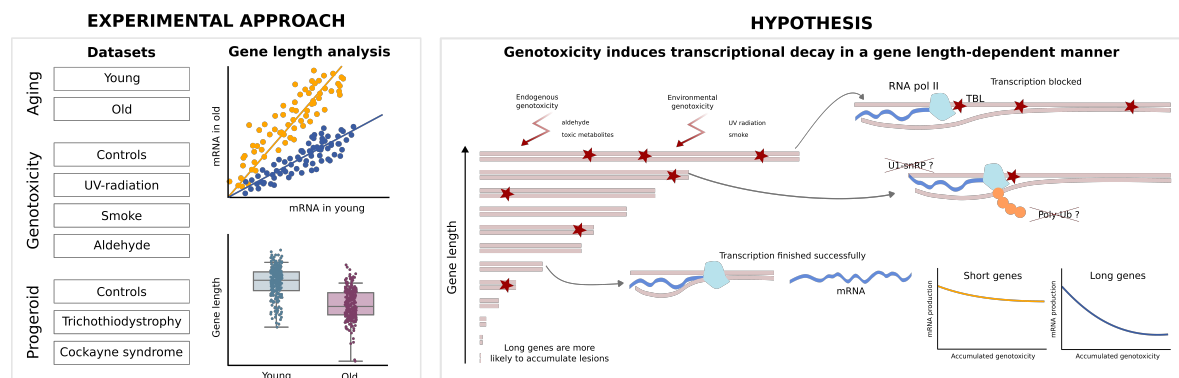

## Abstract

A causative role for DNA damage as a molecular driver of aging has long been advocated. Transcription-blocking lesions (TBLs) accumulate with age in a stochastic manner. Thus, gene expression data might reflect the gene length-dependent accumulation of TBLs. Here we present an analysis of gene expression as a function of gene length in several independent single-cell RNA sequencing datasets of mouse and human aging. We found a pervasive age-associated downregulation of long gene expression, which is seen across species, datasets, sexes, tissues and cell types. Furthermore, long gene downregulation was also observed in premature aging models such as UV-radiation and smoke exposure, and in gene expression data from progeroid diseases Cockayne syndrome and trichothiodystrophy. Finally, we analyzed the length of differentially expressed genes associated to age in both mice and humans. Downregulated genes were significantly longer than upregulated genes. These data highlight a previously undetected hallmark of cellular aging and provide strong support for age-associated accumulation of genotoxic damage inducing a generalized shutdown of RNA polymerase II-mediated long gene transcription.

## 1 Introduction

2 DNA damage has long been proposed as a primary molecular driver of aging [1, 2]. Aging has also  
3 been associated with a series of transcriptional changes, most of which are highly tissue- and cell  
4 type-specific [3]. Even though the search for a global aging signature has been the goal of much research  
5 [4, 5, 6, 7], meta-analyses have shown that very few genes are consistently up- or downregulated with  
6 aging across different tissues [8]. It appears that, at the mRNA level, aging signatures are not defined  
7 by the overexpression of particular sets of genes – in fact, the differences between the transcriptome of  
8 middle-aged and young individuals are bigger than those between young and old individuals, at least  
9 in some human tissues [9]– but rather, an overall decay in transcription [10].

10 Genetic material is constantly challenged throughout the lifespan of the organism, both by endoge-  
11 nous and environmental genotoxins. Some of this damage happens in the form of transcription-blocking  
12 lesions (TBLs), which impede transcriptional elongation [11]. Accumulation of TBLs provokes a  
13 genome-wide shutdown of transcription which also affects undamaged genes through poorly understood  
14 mechanisms, that may be related to RNA polymerase II (RNAP II) ubiquitylation and degradation  
15 [12, 13]. Assuming a constant TBL incidence, meaning that any base pair in the genome has a similar  
16 probability of suffering damage that results in a lesion, a greater accumulation of TBLs is to be  
17 expected in longer genes. As a matter of fact, a gene length-dependent accumulation of other forms  
18 of genetic damage, like somatic mutations, has already been reported in conditions like Alzheimer’s  
19 disease [14]. Hence, TBLs, just like somatic mutations, are expected to accumulate with aging, and  
20 their accumulation is expected to be dependent on gene length. However, unlike somatic mutations,  
21 TBLs have a strong and direct impact on mRNA production, and their gene length-dependent effects  
22 are likely to be measurable from RNA sequencing data of aged tissues, which make single-cell RNA  
23 sequencing (scRNA-seq) atlases and datasets of aging an excellent opportunity to characterize them at  
24 the cell type level over a wide range of tissues.

25 So far, a potential relationship between age-related transcriptional changes and gene length has  
26 received relatively little attention. A recent analysis of the transcript length of 307 genes related to aging  
27 (as extracted from the *GenAge* database) found longer transcript lengths in these genes as compared to  
28 the rest of the protein-coding genes [15]. However, when they studied aging gene-expression signatures  
29 from a human, mouse and rat meta-analysis, they found no significance regarding transcript length in  
30 overexpressed and underexpressed genes, the only exception being the brain (which downregulated  
31 long genes). Of interest, a previous analysis of gene expression profiles in the liver of mice deficient in  
32 the DNA excision-repair gene *Ercc1*, which present features of accelerated aging, had found specific  
33 downregulation of long genes [16]. Similar findings were reported by the authors in naturally aged  
34 rat liver and human hippocampus, indicating that it could reflect a more generalized phenomenon.  
35 Here we aimed to extend these early observations, which were based on bulk microarray and RNA  
36 sequencing data, to the existing aging datasets based on scRNA-seq technology. We also extended  
37 our gene length analyses to mouse and human datasets of lifestyle-induced genotoxic exposure (UV,  
38 smoke) and progeroid syndromes (Cockayne Syndrome and trichothiodystrophy).

## 39 Results

### 40 Age-associated shutdown of transcription preferentially affects 41 long genes

42 In order to test if gene expression at the single-cell level is conserved with aging, we first analyzed 11  
43 organs of the landmark *Tabula Muris Senis (TMS)* dataset of mouse aging [17], on the basis of having  
44 enough experimental replicates and single cells for statistically significant analyses. Thus, we selected  
45 male animals of both young (3-month) and old (24-month) age (Figure 1). Plotting the average gene  
46 expression of aged tissues against their young counterparts yielded scatter plots where data presented  
47 a high linear correlation between both average expression vectors (Figure 1a). However, we observed  
48 that a large number of genes lied below the  $y = x$  line, meaning that their mean expression was lower  
49 in old mice. This was most evident in brain, heart, liver, lung, muscle, pancreas and skin. Having  
50 established that there is an age-related decline in mRNA production, we explored the gene-length  
51 dependence of such decline. To this end, we split the whole transcriptome into four equally sized bins  
52 according to gene length and fitted a multiple linear regression model considering the interaction effect  
53 between average expression in young and the categorical variable representing the gene-length quartile.  
54 We found that the slope of the straight line that fits the gene expression data decreases with gene  
55 length, which confirms that the decay in mRNA production is strongly dependent on gene length. We  
56 graphically show this difference for the two most extreme quartiles (25% shortest and the 25% longest  
57 genes) in Figure 1b; gene lengths and  $p$  values for all comparisons are shown in Supplementary Tables  
58 S1 and S2). The differences in gene lengths were statistically significant in all analyzed organs.

59 This effect was also detected in independent scRNA-seq datasets obtained from mouse lung, kidney,  
60 spleen and skin [18, 19, 20, 21], although there were relevant experimental differences among datasets  
61 (Supplementary Figure S1). Importantly, downregulation of longer genes was also evident in single-cell  
62 data of human lung, pancreas and skin [22, 23, 24, 25] (Supplementary Figure S1). Similarly, the effect  
63 was also detectable in *TMS* female animals (Supplementary Figure S2). These results suggested a  
64 generalized downregulation of long gene expression associated with age, which is seen across tissues,  
65 sexes and species, and in data extracted from several independent scRNA-seq datasets.

### 66 Differentially expressed genes between young and old individuals 67 show a preferential bias for the downregulation of long genes

68 A number of genes change their expression in the same direction during aging in several tissues, and  
69 the search for differentially expressed genes (DEGs) may thus provide a molecular signature of aging  
70 [26]. We next analyzed if DEGs between young and old animals from the *TMS* dataset showed a  
71 preferential bias for the downregulation of long genes. Indeed, that was the case, since DEGs between  
72 young (3-month) and old (24-month) mice showed a statistically significant bias for the downregulation  
73 of long genes for all tissues and comparisons based on a Wilcoxon-Mann-Whitney test (Figure 2,  
74  $p$ -values are provided in the Supplementary Table S3). Once more, this effect was not specific of the  
75 *TMS* dataset, since it was also detected in independent scRNA-seq datasets obtained from mouse lung,  
76 kidney, spleen and skin and human lung, pancreas and skin (Supplementary Figure S3). Finally, the  
77 effect was also detectable in *TMS* female animals (Supplementary Figure S4). Despite the fact that  
78 inter-individual and inter-tissue differences were apparent in some cases, these data confirmed that  
79 long genes were differentially affected by the age-associated shutdown of transcription.

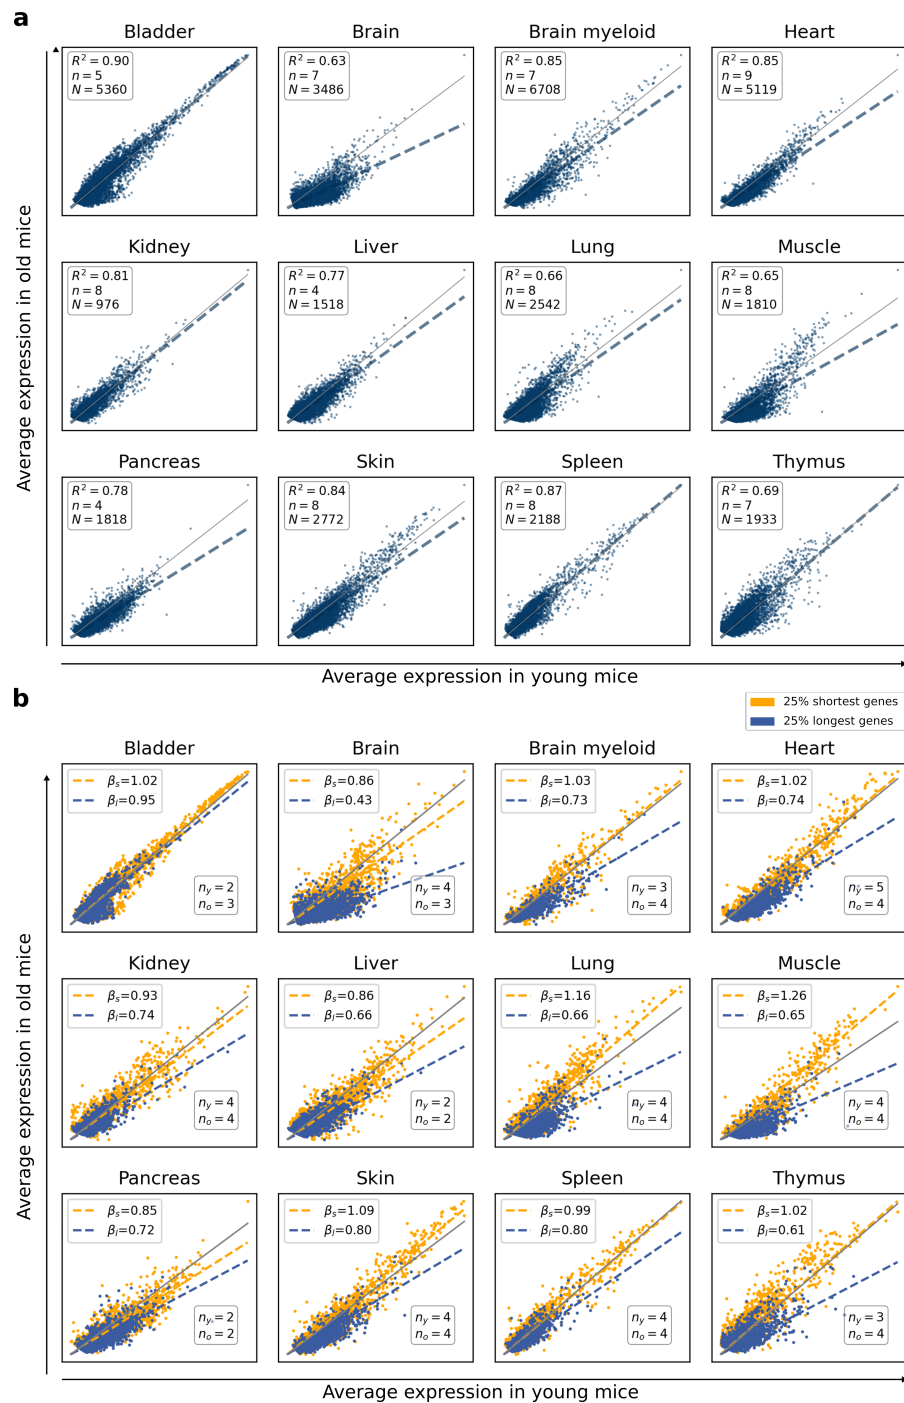

**Figure 1. A generalized, age-associated shutdown of long gene transcription.** **a**, Gene expression is highly conserved but shows a detectable decay with aging. Scatter plots showing the average gene expression in 24-month old mice against average gene expression in 3 month-old mice in 11 tissues from the *TMS FACS* and the *TMS droplet* datasets [17]. Each dot represents a gene.  $N$ : number of single cells;  $n$ : number of biological replicates.  $R^2$ : coefficient of determination. The grey line represents  $y = x$ . **b**, A generalized shutdown of transcription is apparent in long genes. The scatter plots show the average gene expression of the 25% shortest (yellow) and the 25% longest (blue) genes in 24 month-old versus in 3 month-old mice.  $\beta_s$  and  $\beta_l$  represent the slopes of the straight lines that best fit the data points corresponding to *short* and *long* genes, respectively. The number of young ( $n_y$ ) and old ( $n_o$ ) biological replicates are shown.



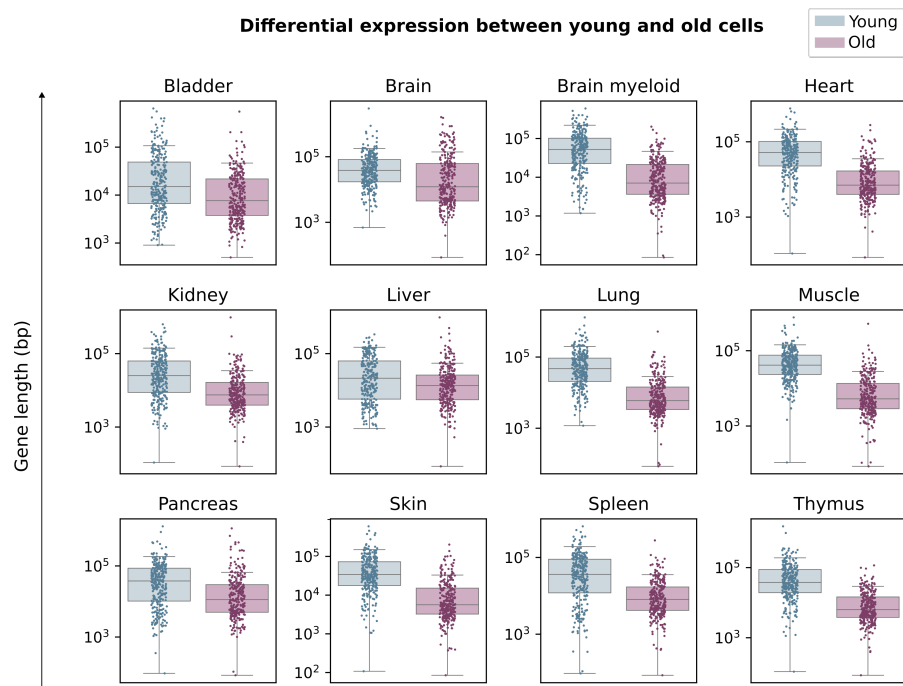

**Figure 2. Differentially expressed genes between young and old animals show a preferential bias for the downregulation of long genes.** Top 300 DEGs between young and old cells in 12 aging datasets from the *Tabula Muris Senis*. The 300 differentially expressed genes between 3 months old and 24 months old male mice were obtained using the Wilcoxon method. The difference between young and old DEG length is significant in all tissues ( $p$ -value < 0.001), see Supplementary table S3

80 **The age-associated decrease in the expression of long genes is**  
81 **not cell type-specific**

82 Since many aging signatures are cell type-specific, a relevant open question was if the age-associated  
83 downregulation of long genes might be restricted to a particular cell type that is abundantly and  
84 ubiquitously located across tissues, such as fibroblasts or endothelial cells. To answer this question,  
85 we selected the four existing *TMS* heart datasets and analyzed the gene length of expressed genes  
86 (Figure 3). As expected, shorter genes were overexpressed in old mice as compared to young mice  
87 in all four datasets (Figure 3a). Compartmentalization of the analyses onto the 11 single-cell types  
88 detected in at least two datasets showed that young animals expressed longer genes in all cell types  
89 analyzed, including tissue-specific cells such as cardiomyocytes and infiltrating cell types such as B  
90 and T lymphocytes (Figure 3b). Therefore, a pervasive downregulation of long genes was detectable  
91 across aged tissues and cell types.

92 **Genotoxic UV exposure of young mouse skin mimics age-associated**  
93 **decrease in the expression of long genes**

94 Ultraviolet (UV) radiation of skin exposed to sunlight produces accumulation of DNA damage and  
95 photoaging [27, 28]. Notably, UV-induced photolesions – mainly cyclobutane pyrimidine dimers (CPDs)  
96 and pyrimidine-(6-4)-pyrimidone photoproducts (6-4PPs)– trigger a general shutdown of transcription  
97 and are mainly repaired by the Nucleotide Excision Repair (NER) pathways [13]. The vitamin D

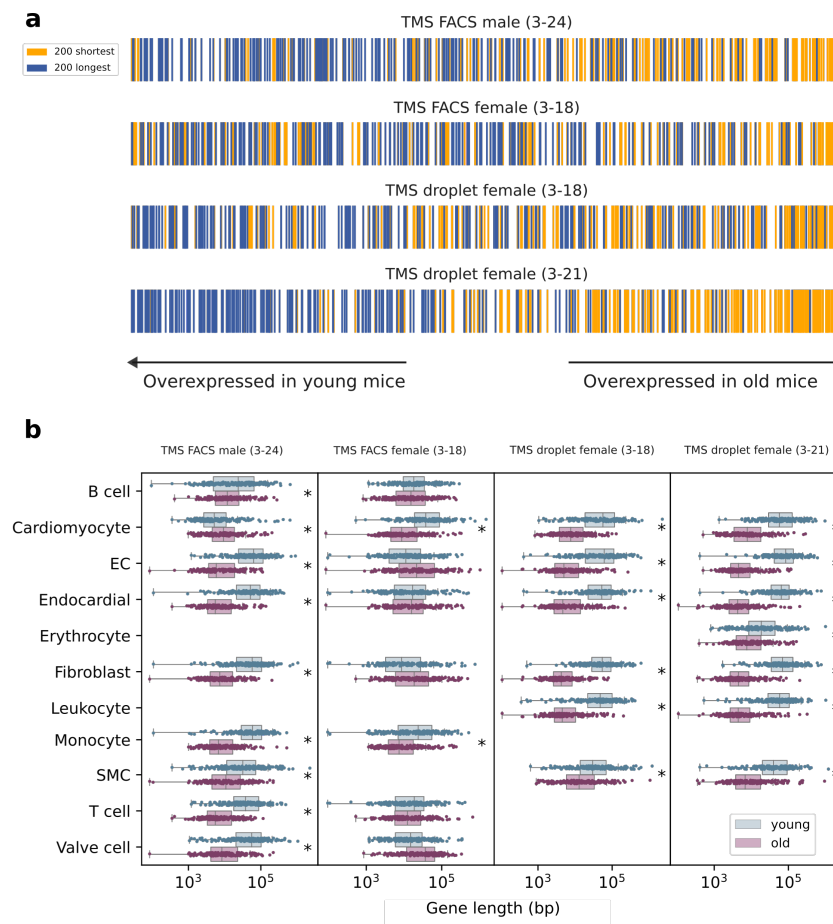

**Figure 3. The age-associated decrease in the expression of long genes is not cell type-specific.** **a**, Genes ranked according to their age-related difference in average gene expression. Genes are shown sorted according to their difference in mean expression between old and young cells. The positions of the top 200 shortest (yellow) and the top 200 longest (blue) genes are shown. **b**, Genes differentially expressed between old and young cells have significantly different gene lengths. Gene length of the 200 most differentially expressed genes (DEGs) between young and old cells within each cell type. EC, endothelial cell. SMC, smooth muscle cell. Significant differences (Wilcoxon-Mann-Whitney test,  $p$  - value < 0.01) are marked with an asterisk (\*).

98 system provides a local adaptive response to UV radiation, reducing DNA damage, inflammation  
 99 and photocarcinogenesis [29]. To test if genotoxic damage to DNA (a premature aging model) also  
 100 affected the transcription of long genes, we analyzed a single-cell RNAseq dataset of young (five to  
 101 six-week-old) mouse skin irradiated with UVB or normal light [30]. One of the UV-irradiated groups  
 102 was injected with vitamin D (Figure 4). A Uniform manifold approximation and projection (UMAP)  
 103 plot of the merged datasets of mice skin shows the 11 cell types detected in this experiment using  
 104 unsupervised cell clustering (Figure 4a). Of note, long gene expression decreased in UV-radiated  
 105 skin as compared to both healthy and vitamin D-treated groups (Figure 4b-c). An analysis of the  
 106 length of the top 300 DEGs computed between the three conditions (the genes differentially expressed  
 107 in each of the conditions against the remaining two) further demonstrated that longer genes were  
 108 differentially affected by UVB exposure (Figure 4d-e). Finally, this effect was detected in all skin  
 109 cell types, although not all long gene transcriptional phenotypes were rescued by vitamin D injection  
 110 (Figure 4f). These results strongly suggested that environmental genotoxic damage by UV-radiation  
 111 may induce a generalized shutdown of long gene transcription in young animals, which may be partially

112 reverted by vitamin D injection.

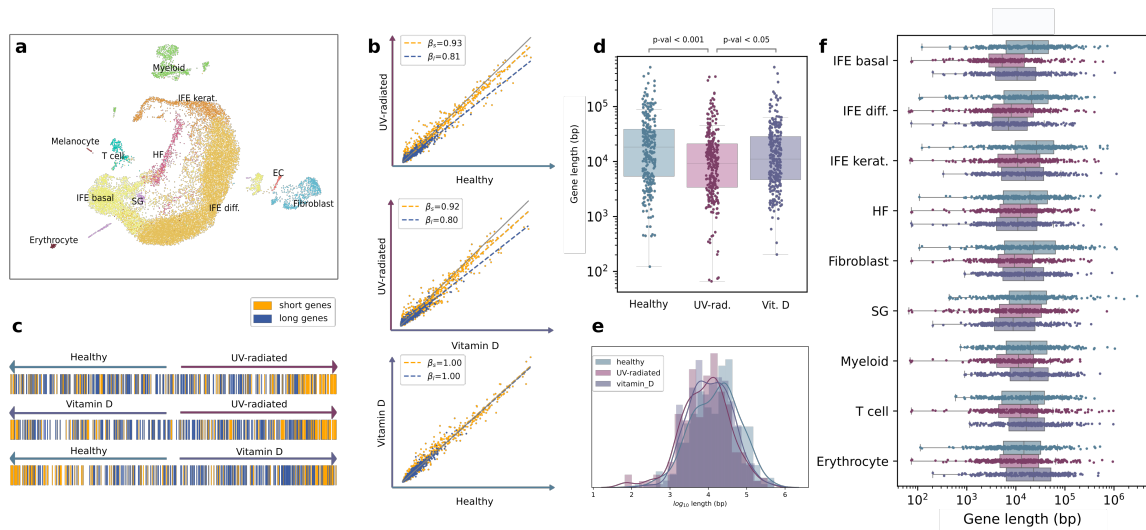

**Figure 4. Genotoxic UV exposure of young mouse skin decreases the expression of long genes.** **a**, Uniform manifold approximation and projection (UMAP) plot showing 11 cell types in the murine skin dataset [30]. The samples corresponding to the three conditions (healthy, UV-radiated and UV-radiated with a vitamin D treatment) were merged into a single dataset. Diff., differentiated. EC, endothelial cell. HF, hair follicle. IFE, interfollicular epidermis. Kerat., keratinocytes. SG, sebaceous gland. **b**, Long-gene expression decreases in UV-radiated skin, but not in vitamin D-treated skin. Scatter plots showing the mean expression in every pair of conditions: UV-radiated *vs* healthy skin (top), UV-radiated *vs* vitamin D-treated skin (middle) and vitamin D-treated *vs* healthy skin (bottom).  $\beta_s$  and  $\beta_l$  correspond to the slopes of the multiple linear regression models with interaction fitted on the 1st and 4th quartiles (top 25% shortest and top 25% longest genes). **c**, Shortest genes are overexpressed in UV-radiated skin. Position of the top 200 shortest and top 200 longest genes, in the differential expression ranking. Genes are shown ranked according to their difference in mean expression between every pair of conditions. Genes are colored according to their length: top 200 shortest (yellow) and top 200 longest (blue). **d**, Length of the genes differentially expressed in UV-radiated skin cells. Top 300 DEGs are computed between the three conditions (those differentially expressed in each of the conditions against the remaining two). The distributions of  $\log_{10}$  gene length (bp) is shown. The p-values were obtained in a Tukey post-hoc test after ANOVA. **e**, Log-transformed gene lengths for the DEGs associated with the three conditions are normally distributed. A histogram and a density plot are shown for each condition. The three distributions are normal (Lilliefors normality test, p-value > 0.05). **f**, DEGs associated with UV-radiated skin cell types are significantly shorter. The DEGs were computed between the three conditions for each cell type separately.

## 113 Smoke exposure of human airways mimics age-associated de- 114 crease in the expression of long genes

115 Chronological age of never-smokers does increase the frequency of mutations in bronchial epithelial  
116 cells at a rate of 28 mutations per cell per year. Mutation frequency in cells from smokers increased  
117 at a rate of 91 mutations per cell per year, i.e. 3.25X higher [31]. In addition to somatic mutations,  
118 exposure to smoke from organic matter is known to provoke TBLs [11], due to benzo[a]pyrene diol  
119 epoxide (BPDE) reacting with guanines to form bulky DNA adducts [13]. To test if the lifestyle of  
120 smokers affected specifically the expression of long genes in airway epithelial cells, we analyzed a  
121 scRNA-seq dataset [32] of human trachea of never-smokers and heavy smokers (subjects who had been

122 smoking for >20 years) of a similar age range (Figure 5). A UMAP plot of the merged datasets of both  
 123 never-smokers and heavy smokers detected 13 cell types in human trachea (Figure 5a). As expected by  
 124 their increased accumulated genotoxicity, long gene expression significantly decreased in heavy smokers  
 125 as compared to never-smokers (Figure 5b-c, *p*-values in Supplementary Table S4). An analysis of the  
 126 length of the top 300 DEGs computed between both groups further demonstrated that longer genes  
 127 were differentially affected by smoke exposure (Figure 5d-e). Finally, this effect was not cell-specific  
 128 since it was detected in all tracheal cell types (Figure 5f). These results confirmed that environmental  
 129 genotoxic damage induces a generalized shutdown of long gene transcription.

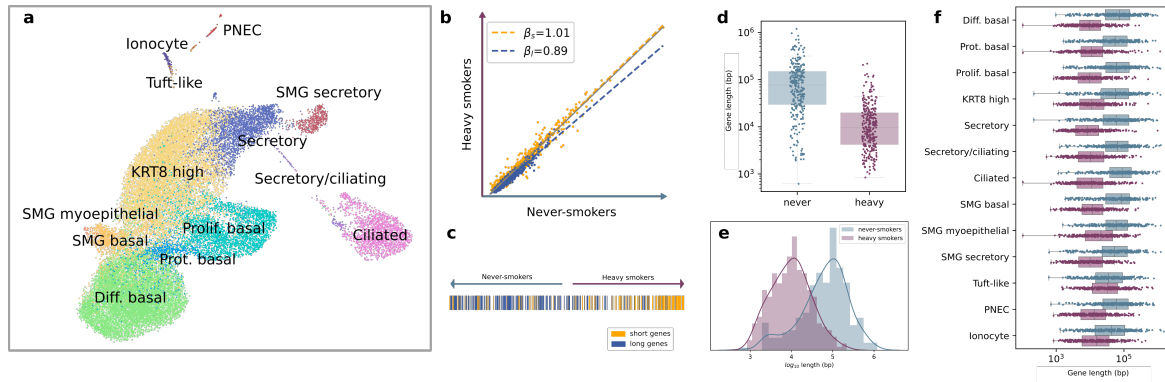

**Figure 5. Smoke exposure of human airway epithelial cells mimics age-associated decrease in the expression of long genes.** **a**, UMAP showing the 13 detected cell types in the human trachea dataset. The samples corresponding to the two conditions (never-smokers and heavy smokers) were merged into a single dataset. Diff, differentiated. KRT8, Keratin 8. PNEC, pulmonary neuroendocrine cells. Prolif., proliferating. Prot., proteasomal. SMG, submandibular salivary glands. **b**, Long-gene expression is decreased in heavy smokers. The scatter plot shows the average gene expression in heavy smokers *vs* average gene expression in never-smokers.  $\beta_s$  and  $\beta_l$  correspond to the slopes of the linear regression models fitted on the 1st and 4th quartiles (top 25% shortest and top 25% longest genes). **c**, Shortest genes are overexpressed in airway cells from heavy smokers. Position of the top 200 shortest (yellow) and top 200 longest (blue) genes in the differential expression ranking. **d**, The length of the genes differentially expressed in airway cells from heavy smokers *vs* never-smokers. 300 DEGs are computed between the two conditions. The distributions of  $\log_{10}$  gene length (bp) is shown. The *p*-values were obtained in a Mann Whitney U test. **e**, Log-transformed gene lengths for the DEGs associated with never smokers are not normally distributed. A histogram and a density plot are shown for each condition. Only the distribution of the DEG lengths for heavy smokers passed the Lilliefors normality test. **f**, DEGs associated with heavy smoker airway cell types are significantly shorter. The DEGs were computed between never-smokers and heavy smokers for each cell type separately.

## 130 Transcriptional stress in progeroid diseases Cockayne Syndrome 131 and trichothiodystrophy results in a decrease in the expression 132 of long genes

133 A number of progeroid diseases are caused by mutations functionally linked to genome maintenance  
 134 and DNA damage repair [33]. Of particular interest to this work, a subset of defects in repair genes  
 135 impair transcription-coupled nucleotide excision repair (TC-NER), i.e. TBLs remain unrepaired,  
 136 causing RNAPII stalling and ultimately syndromic features such as Cockayne Syndrome, xeroderma  
 137 pigmentosum, and trichothiodystrophy [11]. Of interest, increased cutaneous photosensitivity is one of  
 138 the clinical features of patients suffering from these conditions, and is caused by deficiencies in genes

139 coding for components of the TC-NER.

140 Endogenous formaldehyde is abundant in the body, causing DNA crosslinks, oxidative stress and  
141 potentially contributing to the onset of Fanconi Anemia and other syndromes [34]. On the other  
142 hand, Cockayne Syndrome is caused by loss of the Cockayne Syndrome A (CSA) or CSB proteins. Of  
143 note, double knock-out mice deficient in both formaldehyde clearance (*Adh5*<sup>-/-</sup>) and CSB protein  
144 (*Csb*<sup>m/m</sup>) develop transcriptional stress in a subset of kidney cells and features consistent with human  
145 Cockayne Syndrome [35]. To test if kidney cells of these animals undergoing formaldehyde-driven  
146 transcriptional stress specifically decreased transcription of long genes, we analyzed single-cells of three  
147 knockout mice – *ADH5KO* (deficient in formaldehyde clearance), *CSBKO* (Cockayne Syndrome group  
148 B knock-out, also known as *Erc6*), and *DKO* (*Adh5*<sup>-/-</sup>*Csb*<sup>m/m</sup> double knock-out) – against those  
149 of wild type (*WT*) mice (Figure 6). Interestingly, specific downregulation of long genes was already  
150 detected in *ADH5KO* and *CSBKO* single mutants. Both mutations seemed to synergize causing further  
151 downregulation of long genes in the *DKO* animals as compared to *WT* mice (Figure 6A-B, *p*-values in  
152 Supplementary Table S4). An analysis of the length of the top 300 DEGs computed between *WT* and  
153 *ADH5KO*, *WT* and *CSBKO*, and *WT* and *DKO* groups further demonstrated that longer genes were  
154 differentially affected by formaldehyde-driven transcriptional stress (Figure 6C).

155 Encouraged by these results, we analyzed a microarray dataset of human mesenchymal stromal  
156 cells (MSCs) derived from a Cockayne Syndrome patient bearing a *CSB/ERCC6* mutation, which  
157 are known to present marked changes in their transcriptome upon UV-radiation [36]. In fact, skin  
158 fibroblasts from this patient were first reprogrammed to generate induced pluripotent stem cells,  
159 which were then gene-corrected with CRISPR-Cas9, and differentiated to MSCs. Thus, the available  
160 data included UV-radiated MSCs *vs* MSCs in normal conditions in both mutant (*ERCC*<sup>mut</sup>) and  
161 gene-corrected (*ERCC*<sup>GC</sup>) backgrounds (Figure 7). As expected, UV-radiation on *ERCC*<sup>mut</sup> cells  
162 induced a decrease in long gene expression as compared to normal conditions in both mutant and  
163 gene-corrected (*ERCC*<sup>GC</sup>) cells (Figure 7a). Plotting of the gene lengths of the top 300 DEGs between  
164 cells with and without UV-radiation exposure in both mutant and gene corrected backgrounds, further  
165 demonstrated a bias for long gene downregulation (Figure 7b-c). This was due to the combined  
166 effect of UV-radiation and *CSB/ERCC6* mutation, since comparisons between mutant (*ERCC*<sup>mut</sup>)  
167 and gene corrected (*ERCC*<sup>GC</sup>) cells in normal conditions (control) and after UV-radiation exposure  
168 demonstrated that GC-cells were unaffected in control conditions (Figure 7d). An analysis of the  
169 length of the 300 most differentially expressed genes between mutant and gene-corrected cells further  
170 illustrated this point (Figure 7e-f). Overall, these results demonstrated that transcriptional stress  
171 provided by aldehyde and UV-radiation in Cockayne Syndrome preferentially affected the transcription  
172 of long genes.

173 Finally, we tested if long gene transcription was also affected in a second progeroid syndrome,  
174 trichothiodystrophy (TTD). To this end, we analyzed the length of the DEGs obtained by Lombardi  
175 et al. [37] between a cancer-free photosensitive trichothiodystrophy (PS-TTD) patient carrying a  
176 mutation in the *ERCC2* gene and her healthy mother, both in basal conditions and upon UV-radiation.  
177 Selecting the genes that were significantly (*p*-value ≤0.05) over- or underexpressed in PS-TTD and  
178 with a substantial effect size (logFC ≥2 in either direction), we observed that the DEGs associated  
179 with PS-TTD were significantly shorter upon UV-radiation (Figure 7g). These results suggested that  
180 other progeroid syndromes may present a similar phenotype of reduced long gene transcription.

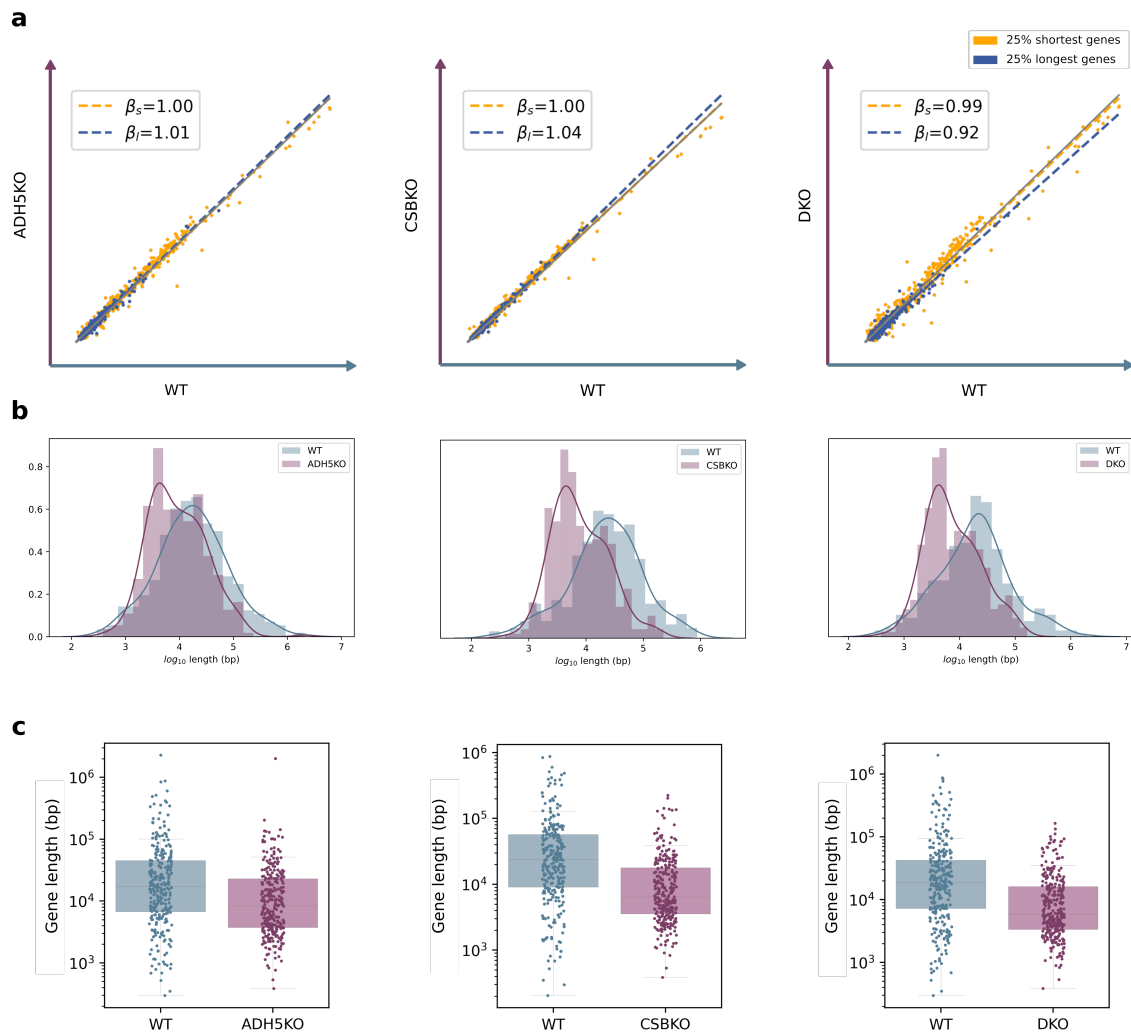

**Figure 6. A mouse model of Cockayne Syndrome mimics age-associated decrease in the expression of long genes in the kidney.** **a**, Correlation between global average gene expression in each of the knock-outs against the wild type mice. The average gene expression in three knockout mice – *ADH5KO* (deficient in formaldehyde clearance) *CSBKO* (Cockayne Syndrome group B knock-out, also known as *Ercc6*) and *DKO* (*Adh5*<sup>-/-</sup>*Csb*<sup>m/m</sup> double knock-out) – against wild type mice. Each data point represent a gene.  $\beta_s$  and  $\beta_l$  represent the slopes of the straight lines that best fit the data points corresponding to the 25% shortest (yellow) and 25% longest (blue) genes, respectively. **b-c**, Distribution of gene lengths in the genes differentially overexpressed in each of the knock-outs *vs* the wild type mice. The log-transformed gene length of the 300 most differentially expressed genes between each of the knock outs and the wild type mice are shown in a density plot over a histogram (**b**) and a stripplots over boxplots (**c**).

## 181 Published aging signatures are influenced by gene length-dependent 182 transcriptional decay

183 A number of aging-related transcriptional signatures have been proposed for both mice and humans. A  
184 recent study identified a set of mouse *global aging genes* (*GAGs*) [26], defined as genes whose expression  
185 varies substantially with age in most (>50%) of the tissue-cell types across several tissues of the *TMS*  
186 dataset. They found that *GAGs* exhibited a strong bimodality, i.e., that they were either upregulated  
187 or downregulated with aging in most tissues. However, to our knowledge no study of gene length has



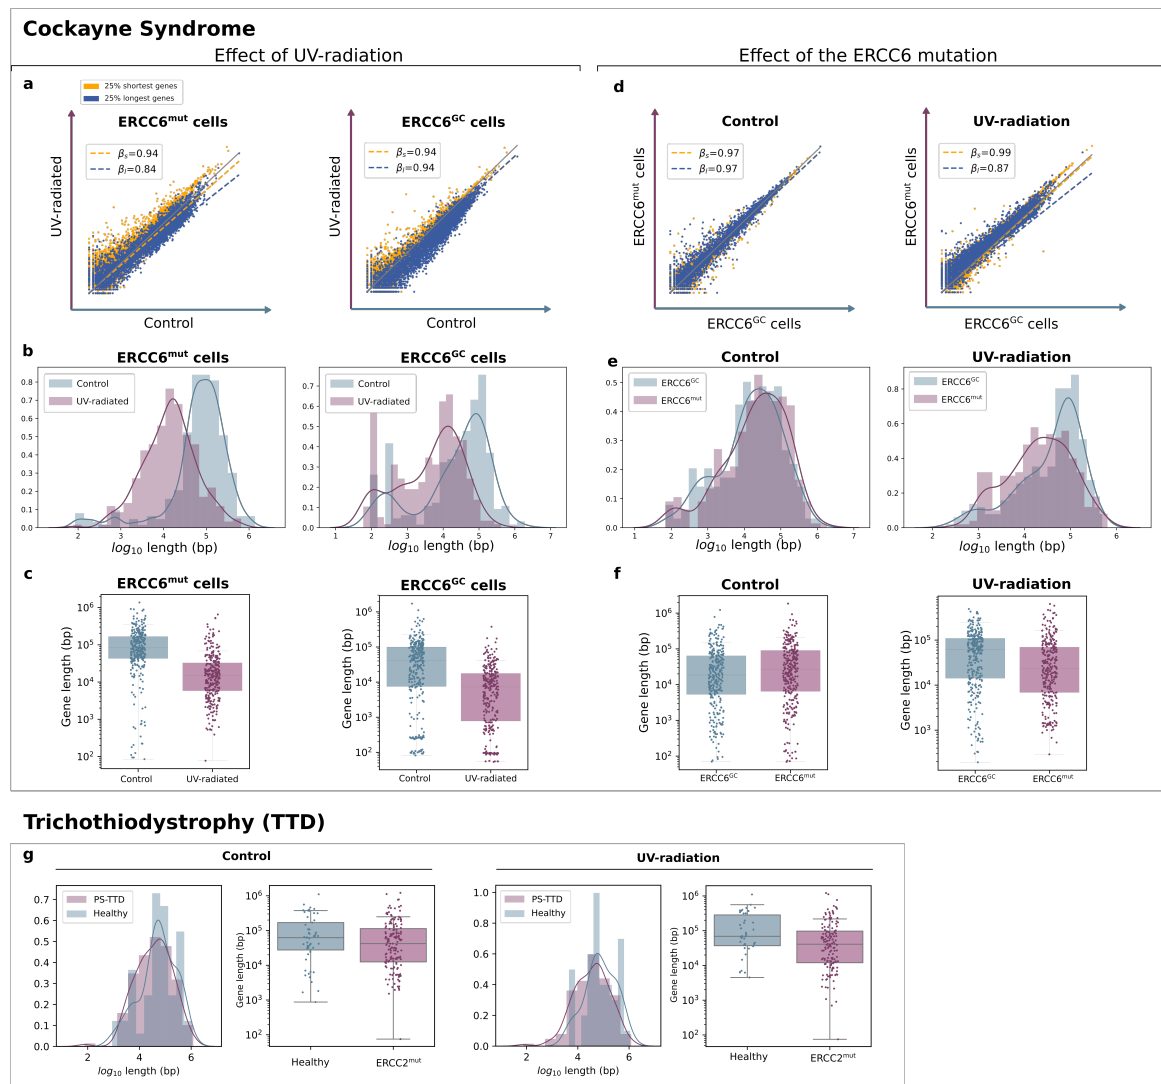

**Figure 7. Human Cockayne Syndrome and trichothiodystrophy (TTD)-derived cells mimic age-associated decrease in the expression of long genes.** a-c, Effect of UV-radiation on cells carrying a mutation in Cockayne Syndrome group B (ERCC6). Average gene expression in UV-radiated cells *vs* in normal conditions in mutant (ERCC<sup>mut</sup>) and gene corrected (ERCC<sup>GC</sup>) cells (a). The gene lengths of the 300 most differentially expressed genes between cells with and without UV-radiation exposure in mutant and gene corrected cells, shown as overlapped density plots (b) and separate boxplots (c). d-f, Baseline effect of the ERCC6 mutation on length-dependent expression. Average gene expression between mutant (ERCC<sup>mut</sup>) and gene corrected (ERCC<sup>GC</sup>) cells in normal conditions (control) and after UV-radiation exposure (d). Length of the 300 most differentially expressed genes between mutant and gene corrected cells, shown as overlapped density plots (e) and separate boxplots (f). g, Length of the DEGs ( $|\log_{2}FC| \geq 2$  and  $p\text{-value} \leq 0.05$ ) between a PS-TTD patient and her healthy mother in basal conditions (control) and upon UV-radiation.

188 been applied to these genes. We analyzed the length of GAGs (Figure 8) and found that genes that  
 189 are downregulated with aging tend to be longer than those that were found to be upregulated, and  
 190 that their difference in length is statistically significant (Figure 8a, Wilcoxon-Mann-Whitney test,  
 191  $p\text{-value} < 0.01$ ).

192 In humans, the first large-scale meta-analysis (14,983 individuals) of aging-related gene expression  
 193 profiles identified 1,497 genes differentially expressed with chronological age in peripheral blood  
 194 mononuclear cells [38]. Interestingly, long genes downregulated with aging in this human cohort,

195 the differences in length between upregulated and downregulated genes being statistically significant  
196 (Figure 8b). Overall, these data suggest that transcriptomic aging signatures are influenced by gene  
197 length-dependent transcriptional decay.

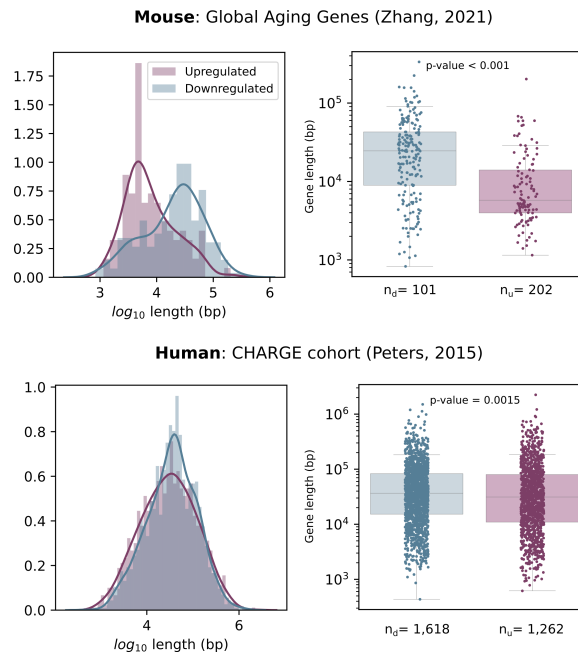

**Figure 8. Down-regulated genes are longer than up-regulated genes in two published aging transcriptomic signatures.** The length of the genes from two aging signatures (murine and human) are shown as two overlapped histograms and separate boxplots. The number of up-and down-regulated genes in each signature are shown as  $n_d$  and  $n_u$ , respectively. The gene length is different between the two categories according to the Mann-Whitney test (p-values shown in the figure).

## 198 Discussion

199 In this article, we report that a generalized age-related decline in gene expression is dependent on  
200 gene length. The fact that gene length affects mRNA expression levels has long been known [39]. In  
201 early development, gene size and architecture influences the expression timing of specific genes [40].  
202 This is also true more generally, for instance in the immediate cellular response to external stimuli,  
203 where shorter pre-mRNA molecules are synthesized first [41]. Furthermore, gene lengths appear to be  
204 compartmentalized among chromosomes, and tissue-specific expression patterns may be detected [42].

205 RNA polymerase II (RNAP II)-driven transcription can be divided into initiation, pausing, elonga-  
206 tion, 3' end formation and termination stages; each step being tightly regulated [43]. Once initiated,  
207 transcription pauses downstream from the transcription start site and requires specific signaling for  
208 pause-release, elongation and processivity. Cyclin-dependent kinases CDK12 and CDK13 seem to be  
209 involved in the regulation of RNAP II elongation, processivity and selection of alternative polyadeno-  
210 lation sites [44]. Of interest, the GC content of the initially transcribed sequence determines early RNAP  
211 II elongation rates, and recognition of a 5' splice site (SS) by U1 snRNP promotes RNAP II elongation  
212 potential [45]. This is related to a process known as *telescripting*, whereby U1 snRNP base pairing with  
213 5'SS avoids premature 3' end cleavage and polyadenylation at cryptic intronic sites [46, 47]. It is likely  
214 that long gene transcription is mediated by many other RNA-binding proteins (RBPs) as well, many  
215 of which have additional functions in the regulation of pre-mRNA splicing [48]. In fact, only about

216 half of the introns present in newly synthesized pre-mRNA are co-transcriptionally spliced [49], further  
217 supporting alternative roles for specific RBP subsets. Although we have no mechanistic understanding  
218 of which dysfunction is mediating the apparent loss of long gene transcription associated to aging, our  
219 data may generate new avenues for aging-related research, where the relevance of pathways related to  
220 RNAP II elongation and processivity remains virtually unexplored.

221 Premature transcript termination by RNAP II has already been described in some contexts.  
222 An increase in elongation rate (speed) concomitant to premature termination at cryptic intronic  
223 polyadenylation signals has recently been reported during heat shock, which was mediated by inhibition  
224 of U1 telescripting [50]. Interestingly, failure to target the stalled RNAP II for degradation by  
225 polyubiquitination of a single residue is enough to shutdown long gene transcription, the expression of  
226 shorter genes being unaffected [51, 52]. Further, the concept of *long-gene transcriptopathy* has been  
227 proposed as a possible mechanism underlying a number of neurological and psychiatric disorders, some  
228 of which are age-associated [53, 54, 48]. RNA-binding protein SFPQ mediates CDK9 recruitment  
229 to the transcription elongation complex, which activates RNAP II-CTD. Neuron-specific ablation of  
230 SFPQ downregulated a regulon of 135 genes, which account for less than 10 percent of the genes  
231 with a pre-mRNA >100 kb in length, inducing neuronal cell death and embryonic lethality [54].  
232 Similarly, muscle-specific ablation of SFPQ induced metabolic myopathy, severe progressive muscle  
233 mass reduction and impairment of motor function. This was shown to be mediated by downregulation  
234 of long genes regulating energy metabolism in skeletal muscle [48]. While the specific mechanisms  
235 underlying the generalized age-associated downregulation of long genes that we report here remain to  
236 be determined, it seems likely that they will be related to some of the aforementioned mechanisms.  
237 For example, a longitudinal analysis of gene expression differences in a human cohort that followed  
238 65 healthy individuals between ages 70 and 80 [55] found changes in the expression of the *SFPQ*  
239 gene among the strongest associations with age. Of note, the key importance of RNA metabolism  
240 dysregulation in human aging has long been known [56].

241 Accumulation of genotoxic damage with chronological age is pervasive, and it may also be signifi-  
242 cantly incremented through lifestyle choices [27, 31, 57, 58]. The fact that augmented DNA damage  
243 specifically induces downregulation of long genes is of great interest. A recent study has shown that  
244 UV-mediated global transcription shutdown favored transcription restart from shorter mRNAs with  
245 less exons [59]. Similarly, transcription blockage by DNA damage is known to generate neurodegener-  
246 ative processes associated to human genetic syndromes deficient in nucleotide excision repair, such  
247 as Cockayne Syndrome and xeroderma pigmentosum [60]. Our data showing that several models of  
248 progeroid disease specifically downregulate long genes are most likely true as well for other TC-NER  
249 syndromes.

250 The search for aging-related gene signatures has provided relatively little advance to the field. In  
251 our opinion, the straightforward mechanism depicted here (of DNA damage-induced loss of RNAP II  
252 processivity as a molecular driver of aging) might better explain many of the age-associated features  
253 and may thus provide a fruitful research avenue for the aging field. Future work should shed light on  
254 the specific mechanisms underlying loss of long gene transcription associated with aging.

## 255 Methods

### 256 Data inclusion criteria

257 In order to analyze balanced aging datasets, samples were selected according to the following criteria:  
258 1) When sex annotations were available, same-sex datasets were generated. 2) Individuals of the

259 same age were used to create the "young" and the "old" cohorts. 3) In datasets including samples  
260 from different sub-tissues, samples corresponding to the sub-tissues with representation in the two age  
261 cohorts were selected.

262 In murine datasets derived from *Tabula Muris Senis* data, 3 month-old and 24 month old mice  
263 were used to form the young and old cohorts, respectively. In all *TMS* female murine aging datasets 18  
264 month animals were used to form the old cohort. In the murine dermal fibroblast dataset [21], samples  
265 from newborn mice were not included.

266 Regarding human aging datasets, samples from newborn and middle-aged individuals were discarded  
267 and sex-stratified cohorts were created when possible. In the human aging pancreas dataset [22],  
268 samples from pediatric donors as well as those from a 38-year old patient were removed. Thus, only  
269 two young (21 and 22 years old) and two old (44 and 54 years old) donors were included in the aging  
270 dataset.

271 In the human trachea of heavy smokers and never-smokers dataset [32] only donors aged over 50  
272 years were included in the dataset to avoid age as a confounding variable.

## 273 Data processing pipeline

274 Single-cell RNA-seq datasets were preprocessed using a standard preprocessing pipeline in *Scanpy* [61]:  
275 normalization, log-transformation of counts, feature selection using *triku* [62], dimensionality reduction  
276 through Principal Component Analysis (PCA) and Uniform Manifold Approximation and Projection  
277 (UMAP) [63], and community detection using *Leiden* [64]. In some cases, when the original labels were  
278 too granular, some cell identities were merged into broader categories before proceeding to downstream  
279 analyses.

## 280 Datasets

### 281 Male murine aging datasets

282 *TMS* male mice aged 3 months and 24 months were selected to create balanced datasets of aging of 11  
283 organs (12 comparisons): bladder, brain, brain myeloid, heart, kidney, liver, lung, muscle, pancreas,  
284 skin, spleen and thymus (Almanzar et al. [17]).

### 285 Female murine aging datasets

286 Due to the lack of available 24 month-old females in the *TMS* dataset, we chose a set of 3 month  
287 and 18 month-old mice to create 12 balanced female aging datasets: TMSF muscle, TMSF brain,  
288 TMSF brain myeloid, TMSD heart, TMSF heart, TMSF thymus, TMSF skin, TMSF pancreas, TMSD  
289 mammary gland, TMSF mammary gland, TMSF spleen and TMSF kidney.

### 290 Additional murine and human datasets

291 We analyzed six additional murine aging datasets of several tissues: lung cells from 3 and 24 month  
292 old mice (Angelidis et al. [18], GEO accession [GSE124872](#)), lung, spleen and kidney cells from 7 and  
293 21 months old mice (Kimmel et al. [19], [GSE132901](#)), brain cells from 2-3 and 21-23 month old mice  
294 (Ximerakis et al. [20], [GSE129788](#)) and dermal fibroblasts from 2 and 18 month old mice (Salzer et al.  
295 [21], [GSE111136](#)). We also analyzed four human datasets: lung cells from 46 and 75 years old male  
296 healthy donors (Travaglini et al. [24], available at Synapse under accession [syn21041850](#)), lung cells  
297 from young (21, 22, 32, 35 and 41 years old) and old (64, 65, 76 and 88 years old) male and female

298 healthy donors Raredon et al. [25], GSE133747), pancreatic cells from X and Y years old male and  
299 female healthy donors (Enge et al. [22], GSE81547), and whole-skin cells from X and Y years old  
300 donors ([23], GSE130973). Murine lung, human lung and human pancreas datasets were processed and  
301 cell type annotated as in Ibáñez-Solé et al. [65].

### 302 Murine aging heart

303 Four aging balanced datasets were created from samples from the TMS FACS heart and the TMS  
304 droplet heart and aorta datasets. All mice aged 3 months, 18 months and 21 months were selected and  
305 combined so that all mice representing an age cohort within a dataset were of equal age and sex: TMS  
306 FACS male (3-24 months), TMS FACS female (3-18 months), TMS droplet female (3-18 months) and  
307 TMS droplet female (3-21 months).

### 308 Murine UV-radiated skin

309 The datasets corresponding to the three conditions (*healthy*, *UV-radiated* and *vitamin D*) were  
310 downloaded from the Gene Expression Omnibus (GSE173385). We checked that the age of the mice  
311 used in the study was identical between conditions. The three datasets were subjected to the standard  
312 processing pipeline described in Data processing pipeline separately. Then, the Leiden community  
313 detection algorithm was run and cell type annotations were added to the resulting clusters based on  
314 the expression of known cell type markers. The murine dermal cell type characterization by Joost et al.  
315 was used as a reference.

316 The clusters were annotated based on the following gene markers: «IFE basal» (basal keratinocytes  
317 from the interfollicular epidermis, *Krt5*, *Krt14*, *Mt2*); «IFE diff.» (differentiating keratinocytes, *Krt1*,  
318 *Krt10*, *Ptgs1*); «IFE kerat.» (terminally differentiated cells in the keratinized layer, *Lor*, *Flg2*.);  
319 «HF» (hair follicle cells, *Krt17*, *Krt79*, *Sox9*); «Fibroblast» (*Col1a1*, *Col3a1*, *Col1a2*, *Dcn*, *Lum*,  
320 *Spare*); «Myeloid» (*Cd74*, *Lyz2*); «SG» (sebaceous gland cells, *Mgst1*, *Scd1*, *Krt25*, *Pparg*); «T cell»  
321 (*Cd3d*, *Thy1*, *Nkg7*); «EC» (endothelial cells, *Mgp*, *Fabp4*); «Melanocyte» (*Mlana*, *Pmel*, *Tyrp1*);  
322 «Erythrocyte» (*Hbb-bs*, *Hbb-bt*, *Hbba-a2*).

323 The Lilliefors normality test [67] was conducted on the log-transformed lengths of the differentially  
324 expressed genes for each of the conditions, using Python module `statsmodel`. The null hypothesis – that  
325 the  $\log_{10}$  gene lengths follow a normal distribution – could not be rejected (cutoff: 0.05), meaning that  
326 the distribution of gene lengths within each group is normally distributed. We tested whether the mean  
327 lengths of the DEGs were significantly different across conditions using ANOVA (`stats.f_oneway`).  
328 The null hypothesis that the three means were equal was rejected (p-value 3.67E-06). Post-hoc analysis  
329 (Tukey test, `scikit_posthocs.posthoc_tukey`) was run to test which of the pairwise comparisons  
330 between the three conditions yielded a statistically significant difference. Additionally, statistical  
331 significance was confirmed with non-parametric alternatives: Kruskal-Wallis (`stats.kruskal`) and  
332 Dunn test (`scikit_posthocs.posthoc_dunn`).

### 333 Human airway cells from heavy smokers

334 The dataset used in Goldfarbmuren et al. was downloaded from the Gene Expression Omnibus  
335 (GSE134174). Original cell type annotations were used, but subtypes of the same cell types were pooled  
336 into a single category. The final dataset contained 13 cell types: «Diff. basal» (differentiating basal  
337 cells), «Prolif. basal» (proliferating basal cells), «Prot. basal » (proteasomal basal cells), «ciliated»  
338 (the two mature ciliated clusters –A and B– were pooled together), «ionocytes», «PNEC» (pulmonary  
339 neuroendocrine cells), «secretory/ciliating» (hybrid secretory early ciliating cells), «KRT8 high»,

340 «secretory» (mucus secretory cells), «tuft-like» (Tuft-like cells), «SMG basal» (basal cells from the  
341 submucosal gland or SMG, the two clusters –A and B– were pooled into a single category), «SMG  
342 myoepithelial» (myoepithelial cells from the SMG), «SMG secretory» (mucus secretory cells from the  
343 SMG).

344 In order to control for age as a possible confounding factor, we checked the ages of the subjects  
345 in the original dataset. We discarded the youngest donors and only kept samples from donors aged  
346 >50 years. The final dataset consisted of 21,425 cells from 8 donors. Heavy smokers (*T101*, *T120*,  
347 *T154*, *T167*, *T85*) were aged 55-66 years, and never-smokers (*T164*, *T165*, *T166*) were 64-68 years old.  
348 Since the average never-smoker age is slightly higher than the average heavy-smoker age, we can safely  
349 attribute transcriptional changes between these two groups to their smoking status.

350 The Lilliefors test was used to test whether the  $\log_{10}$  length of the DEGs for the two conditions  
351 ("heavy smokers" and "never-smokers") were normally distributed. The null hypothesis could be rejected  
352 (cut-off: 0.05) for the "never-smokers", meaning that DEGs associated with that condition were not  
353 normally distributed, so a MannWhitney U test was used to compare between the means of the two  
354 distributions.

### 355 **Effect of ERCC6 mutation of susceptibility to UV-radiation**

356 The dataset by Wang et al. was downloaded from the Gene Expression Omnibus (GSE124208).  
357 The following samples were included in the dataset: *GSM3525718*, *GSM3525717*, *GSM3525714*,  
358 *GSM3525715*, *GSM3525719*, *GSM3525716*, *GSM3525713* and *GSM3525720*. Those samples correspond  
359 to four experimental conditions: MSCs from Cockayne syndrome patients carrying the ERCC6 mutation,  
360 with (*UV*) and without (*ct*) UV-radiation treatment (*MSC\_mut\_ct*, *MSC\_mut\_UV*); MSCs from  
361 gene-corrected cells with and without UV radiation treatment (*MSC\_GC\_ct* and *MSC\_GC\_UV*).  
362 All samples were merged into a single dataset and expression values were log-transformed.

### 363 **Effect of ERCC2 mutation of susceptibility to UV-radiation**

364 The complete list of DEGs between a cancer-free PS-TTD patient carrying a mutated ERCC2 gene and  
365 her healthy mother in basal conditions and upon UV-radiation were obtained from the Supplementary  
366 Material provided by Lombardi et al. [37]. From the original DEG list, we selected the genes with a  
367 log fold-change greater than 2 (either overexpressed in the sample from the PS-TTD patient or in the  
368 sample from the healthy donor). The same threshold for statistical significance (p-value  $\leq 0.05$ ) as the  
369 one used by the original authors was used.

### 370 **Gene length analysis**

371 Human and mouse gene length annotations for were obtained from Biomart. Total gene length was  
372 calculated as the difference between the transcription end site and the transcription start site.

### 373 **Length-dependent difference in expression in aging and genotoxic conditions**

374 Two different types of analysis were run between conditions: global average gene expression and  
375 length-dependence of transcriptional decay and gene length analysis of the differentially expressed  
376 genes between conditions.



### 377 **Gene length dependence in age-related transcriptional decay**

378 Here, we computed the average gene expression across all cells for a pair of conditions (for instance,  
379 "young" and "old"). We used a scatter plot to represent each gene according to its average expression  
380 in old cells ( $y$  axis) against its average expression in young cells ( $x$  axis). This is a way of looking at  
381 how predictable the expression of each particular gene is in old cells based on the expression of the  
382 same gene in young cells. As we observed that most genes show a great correlation between young and  
383 old cells, even though many of them show expression levels that are lower than what we would have  
384 expected from their expression in young individuals, we then looked at the role gene length plays in  
385 this transcriptional decay. We did so by splitting the transcriptome into four quartiles according to  
386 their length. we considered whole sequence length from transcription start site to transcription end  
387 site. Then, we fitted a linear regression model to the average gene expression in old and young cells  
388 for each of the quartiles, thus obtaining a separate linear model for each quartile, using the formula  
389  $ME_{old} \sim ME_{young} * Q$ , where ( $ME_{old}$  and  $ME_{young}$  are the mean expression vectors for old and  
390 young cells, and  $Q$  is the vector that assigns each gene to a length quartile, to be used as a factor by  
391 the linear model). We observed that the shorter the genes included in the linear model (for instance,  
392 Q1 genes), the greater was the slope of the resulting straight. We performed statistical analysis to  
393 compare between the slope of the Q1 model against each of the three remaining models (Q2, Q3 and  
394 Q4).

395 The same analysis was extended to conditions other than aging, by making analogous comparisons.  
396 In the UV-radiated murine skin analysis, we compared UV-radiated skin against the healthy skin  
397 control (to test for the effect of UV-radiation), the UV-radiated skin against the vitamin D-treated and  
398 UV-radiated skin (effect of vitamin D treatment on damage caused by UV-radiation), and the vitamin  
399 D-treated skin against the healthy skin control (effect of UV-radiation after vitamin D treatment). In  
400 the analysis on the murine model for Cockayne syndrome we compared between each of the knock  
401 outs ( $Adh5^{-/-}$ ,  $Csb^{m/m}$ , and double KO) against the wild type ( $WT$ ). In the analysis of human  
402 mesenchymal stromal cells derived from Cockayne syndrome patients, we compared between the  
403 following conditions: UV-radiated cells against control (both in mutant and gene corrected cells), and  
404  $ERCC^{mut}$  against  $ERCC^{GC}$  (to test for the effect of carrying the ERCC6 mutation, both in normal  
405 conditions and after UV-radiation exposure).

### 406 **Gene length analysis of the differentially expressed genes between conditions**

407 We carried out two types of differential expression analysis: overall differential expression between  
408 conditions and differential expression at the cell type level.

409 Overall differential expression between conditions is based on the assumption that the changes in  
410 cell type composition between the conditions to be compared are negligible, so that the genes that are  
411 detected to be differentially expressed do not correspond to markers defining specific cell types that  
412 are more abundant in one of the conditions. Differential expression analysis between conditions at  
413 the cell type level identifies genes that are over-expressed in one of the conditions. Of course, DEGs  
414 can only be computed for cell types that are present in the conditions to be compared in sufficient  
415 amounts (we used 10 cells as the minimum). Its output is not directly affected by changes in cell type  
416 composition between conditions. However, if the abundance of cell type under study is very different  
417 between conditions – if one cell type is very rare in one of the conditions – the population might not  
418 be well sampled for that condition and the gene length analysis might not be reliable. We therefore  
419 use the two approaches as they are complementary to one another. In either case, we used the Scanpy  
420 function `sc.tl.rank_genes_groups` with `method = "wilcoxon"` to obtain the top 300 differentially

421 expressed genes between conditions.

422 In most cases, pairwise comparisons were made, as in the aging analysis ("young" *vs* "old") or when  
423 analyzing the effect of smoking of human airways ("never-smokers" *vs* "heavy smokers"). In those cases,  
424 two lists of genes were obtained: one per condition. In the analysis of murine UV-radiated skin (Figure  
425 4), we compared between the three conditions simultaneously. In that case, each of three DEG lists  
426 corresponds to the genes that are over-expressed in one condition against the other two conditions  
427 pooled together.

428 First, the Lilliefors test was used check whether gene lengths in each of the conditions were normally  
429 distributed. In cases where the null hypothesis could be rejected ( $p$ -value  $< 0.05$ ) in at least one of the  
430 conditions to be compared, a non parametric test was used to compare between means. In order to  
431 make statistical comparisons between the mean gene length between conditions, we used the following  
432 tests: Student's T test (two conditions, normally distributed), Mann-Whitney's U test (two conditions,  
433 not normally distributed), ANOVA (three conditions) and Tukey's test for post-hoc analysis.

### 434 Code availability

435 Jupyter notebooks and R scripts for reproducing the analyses can be found in [GitLab](#).

## References

1. Björn Schumacher, Joris Pothof, Jan Vijg, and Jan H. J. Hoeijmakers. The central role of dna damage in the ageing process. *Nature*, 592:695–703, 2021. doi: 10.1038/s41586-021-03307-7.
2. Matt Yousefzadeh, Chathurika Henpita, Rajesh Vyas, Carolina Soto-Palma, Paul Robbins, and Laura Niedernhofer. Dna damage - how and why we age? *eLife*, 10:e62852, 2021. doi: 10.7554/eLife.62852.
3. Stephen Frenk and Jonathan Houseley. Gene expression hallmarks of cellular ageing. *Biogerontology*, 19(6):547566, 2018. doi: 10.1007/s10522-018-9750-z.
4. João Pedro de Magalhães, João Curado, and George M. Church. Meta-analysis of age-related gene expression profiles identifies common signatures of aging. *Bioinformatics*, 25(7):875881, 2009. doi: 10.1093/bioinformatics/btp073.
5. Robi Tacutu, Daniel Thornton, Emily Johnson, Arie Budovsky, Diogo Barardo, Thomas Craig, Eugene Diana, Gilad Lehmann, Dmitri Toren, Jingwei Wang, and et al. Human ageing genomic resources: New and updated databases. *Nucleic Acids Research*, 46(D1), 2017. doi: 10.1093/nar/gkx1042.
6. Daniel Palmer, Fabio Fabris, Aoife Doherty, Alex A. Freitas, and João Pedro de Magalhães. Ageing transcriptome meta-analysis reveals similarities between key mammalian tissues. *Aging*, 2019. doi: 10.1101/815381.
7. W. Zhang, S. Zhang, P. Yan, J. Ren, M. Song, J. Li, J. Lei, H. Pan, S. Wang, X. Ma, and et al. A single-cell transcriptomic landscape of primate arterial aging. *Nature Communications*, 11(1), 2020. doi: 10.1038/s41467-020-15997-0.
8. R. Stegeman and V.M. Weake. Transcriptional signatures of aging. *Journal of Molecular Biology*, 429(16):24272437, 2017. doi: 10.1016/j.jmb.2017.06.019.

9. Daniel J. Haustead, Andrew Stevenson, Vishal Saxena, Fiona Marriage, Martin Firth, Robyn Silla, Lisa Martin, Katharine F. Adcroft, Suzanne Rea, Philip J. Day, and et al. Transcriptome analysis of human ageing in male skin shows mid-life period of variability and central role of nf-b. *Scientific Reports*, 6(1), 2016. doi: 10.1038/srep26846.
10. Anthony Yannarell, Dorothy E. Schumm, and Thomas E. Webb. Age-dependence of nuclear rna processing. *Mechanisms of Ageing and Development*, 6:259264, 1977. doi: 10.1016/0047-6374(77)90026-4.
11. Hannes Lans, Jan H. Hoeijmakers, Wim Vermeulen, and Jurgen A. Marteijn. The dna damage response to transcription stress. *Nature Reviews Molecular Cell Biology*, 20(12):766784, 2019. doi: 10.1038/s41580-019-0169-4.
12. Lea H. Gregersen and Jesper Q. Svejstrup. The cellular response to transcription-blocking dna damage. *Trends Biochem Sci.*, 43(5):327–341, 2018. doi: 10.1016/j.tibs.2018.02.010.
13. Jianming Wang, Martina Muste Sadurni, and Marco Saponaro. Rnapii response to transcriptionblocking dna lesions in mammalian cells. *The FEBS Journal*, 2022. doi: 10.1111/febs.16561.
14. Sourena SoheiliNezhad, Robert J. Linden, Marcel Olde Rikkert, Emma Sprooten, and Geert Poelmans. Long genes are more frequently affected by somatic mutations and show reduced expression in alzheimer’s disease: Implications for disease etiology. *Alzheimer’s & Dementia*, 17(3):489499, 2020. doi: 10.1002/alz.12211.
15. Inês Lopes, Gulam Altab, Priyanka Raina, and João Pedro de Magalhães. Gene size matters: An analysis of gene length in the human genome. *Frontiers in Genetics*, 12, 2021. doi: 10.3389/fgene.2021.559998.
16. W. P. Vermeij, M. E. T. Dollé, E. Reiling, D. Jaarsma, C. Payan-Gomez, C. R. Bombardieri, H. Wu, A. J. M. Roks, S. M. Botter, B. C. van der Eerden, S. A. Youssef, R. V. Kuiper, B. Nagarajah, C. T. van Oostrom, R. M. C. Brandt, S. Barnhoorn, S. Imholz, J. L. A. Pennings, A. de Bruin, A. Gyenis, J. Pothof, J. Vijg, H. van Steeg, and J. H. J. Hoeijmakers. Restricted diet delays accelerated ageing and genomic stress in dna-repair-deficient mice. *Nature*, 537:427–431, 2016. doi: 10.1038/nature19329.
17. N. Almanzar, J. Antony, and the Tabula Muris Consortium. A single-cell transcriptomic atlas characterizes ageing tissues in the mouse. *Nature*, 583:590–595, 2020. doi: 10.1038/s41586-020-2496-1.
18. I. Angelidis, L. M. Simon, and I. E. et al. Fernandez. An atlas of the aging lung mapped by single cell transcriptomics and deep tissue proteomics. *Nature Communications*, 10, 2019. doi: <https://doi.org/10.1038/s41467-019-08831-9>.
19. Jacob C. Kimmel, Lolita Penland, Nimrod D. Rubinstein, David G. Hendrickson, David R. Kelley, and Adam Z. Rosenthal. Murine single-cell rna-seq reveals cell-identity- and tissue-specific trajectories of aging. *Genome Research*, 29(12):20882103, 2019. doi: 10.1101/gr.253880.119.
20. M. Ximerakis, S. L. Lipnick, B. T. Innes, S. K. Simmons, X. Adiconis, D. Dionne, B. A. Mayweather, L. Nguyen, Z. Niziolek, C. Ozek, V. L. Butty, R. Isserlin, S. M. Buchanan, S. S. Levine, A. Regev, G. D. Bader, J. Z. Levin, and L. L. Rubin. Single-cell transcriptomic profiling of the aging mouse brain. *Nat Neurosci*, 22(10), 2019. doi: <https://doi.org/10.1038/s41593-019-0491-3>.

21. M. C. Salzer, A. Lafzi, A. Berenguer-Llargo, C. Youssif, A. Castellanos, G. Solanas, F. Oliveira Peixoto, C. S-O. Attolini, N. Prats, M. Aguilera, and et al. Identity noise and adipogenic traits characterize dermal fibroblast aging. *Cell*, 175(6), 2018. doi: 10.1016/j.cell.2018.10.012.
22. M. Enge, H. E. Arda, M. Mignardi, J. Beausang, R. Bottino, S. K. Kim, and S. R. Quake. Single-cell analysis of human pancreas reveals transcriptional signatures of aging and somatic mutation patterns. *Cell*, 171(2), 2017. doi: <https://doi.org/10.1016/j.cell.2017.09.004>.
23. L. Solé-Boldo, G. Raddatz, and S. et al. Schütz. Single-cell transcriptomes of the human skin reveal age-related loss of fibroblast priming. *Commun Biol*, 3(188), 2020. doi: <https://doi.org/10.1038/s42003-020-0922-4>.
24. Kyle J. Travaglini, Ahmad N. Nabhan, Lolita Penland, Rahul Sinha, Astrid Gillich, Rene V. Sit, Stephen Chang, Stephanie D. Conley, Yasuo Mori, Jun Seita, Gerald J. Berry, Joseph B. Shrager, Ross J. Metzger, Christin S. Kuo, Norma Neff, Irving L. Weissman, Stephen R. Quake, and Mark A. Krasnow. A molecular cell atlas of the human lung from single-cell rna sequencing. *Nature*, 587:619625, 2020. doi: 10.1038/s41586-020-2922-4.
25. Micha Sam Brickman Raredon, Taylor Sterling Adams, Yasir Suhail, Jonas Christian Schupp, Sergio Poli, Nir Neumark, Katherine L. Leiby, Allison Marie Greaney, Yifan Yuan, Corey Horien, and et al. Single-cell connectomic analysis of adult mammalian lungs. *Science Advances*, 5(12), 2019. doi: 10.1126/sciadv.aaw3851.
26. Martin Jinye Zhang, Angela Oliveira Pisco, Spyros Darmanis, and James Zou. Mouse aging cell atlas analysis reveals global and cell type-specific aging signatures. *eLife*, 10, 2021. doi: 10.7554/elife.62293.
27. Iñigo Martincorena, Amit Roshan, Moritz Gerstung, Peter Ellis, Peter Van Loo, Stuart McLaren, David C Wedge, Anthony Fullam, Ludmil B Alexandrov, Jose M Tubio, Lucy Stebbings, Andrew Menzies, Sara Widaa, Michael R Stratton, Philip H Jones, and Peter J Campbell. Tumor evolution. high burden and pervasive positive selection of somatic mutations in normal human skin. *Science*, 348:880–886, 2015. doi: 10.1126/science.aaa6806.
28. T Passeron, HW Lim, CL Goh, HY Kang, F Ly, A Morita, J Ocampo Candiani, S Puig, S Schalka, L Wei, B Dréno, and J. Krutmann. Photoprotection according to skin phototype and dermatoses: practical recommendations from an expert panel. *J. Eur. Acad. Dermatol. Venereol.*, 35:1460–1469, 2021. doi: 10.1111/jdv.17242.
29. Clare Gordon-Thomson, Wannit Tongkao-on, Eric J. Song, Sally Carter, Katie M. Dixon, and Rebecca S. Mason. Protection from ultraviolet damage and photocarcinogenesis by vitamin d compounds. *Adv Exp Med Biol.*, 810:303–328, 2014. doi: 10.1007/978-1-4939-0437-2\_17.
30. Yuanbin Lin, Zhanglei Cao, Tianqi Lyu, Tong Kong, Qian Zhang, Kerong Wu, Yuhui Wang, and Jianping Zheng. Single-cell rna-seq of uvb-radiated skin reveals landscape of photoaging-related inflammation and protection by vitamin d. *Gene*, 831:146563, 2022. doi: 10.1016/j.gene.2022.146563.
31. Zhenqiu Huang, Shixiang Sun, Moonsook Lee, Alexander Y Maslov, Miao Shi, Spencer Waldman, Ava Marsh, Taha Siddiqui, Xiao Dong, Yakov Peter, Ali Sadoughi, Chirag Shah, Kenny Ye, Simon D Spivack, and Jan Vijg. Single-cell analysis of somatic mutations in human bronchial

- epithelial cells in relation to aging and smoking. *Nature Genetics*, 54:492–498, 2022. doi: 10.1038/s41588-022-01035-w.
32. Katherine C. Goldfarbmuren, Nathan D. Jackson, Satria P. Sajuthi, Nathan Dyjack, Katie S. Li, Cydney L. Rios, Elizabeth G. Plender, Michael T. Montgomery, Jamie L. Everman, Preston E. Bratcher, and et al. Dissecting the cellular specificity of smoking effects and reconstructing lineages in the human airway epithelium. *Nature Communications*, 11(1), 2020. doi: 10.1038/s41467-020-16239-z.
33. Matthias Rieckher, George A Garinis, and Björn Schumacher. Molecular pathology of rare progeroid diseases. *Trends Mol Med.*, 27:907–922, 2021. doi: 10.1016/j.molmed.2021.06.011.
34. Carla Umansky, Agustín E Morellato, Matthias Rieckher, Marco A Scheidegger, Manuela R Martinefski, Gabriela A Fernández, Oleg Pak, Ksenia Kolesnikova, Hernán Reingruber, Mariela Bollini, Gerry P Crossan, Natascha Sommer, María Eugenia Monge, Björn Schumacher, and Lucas B Pontel. Endogenous formaldehyde scavenges cellular glutathione resulting in redox disruption and cytotoxicity. *Nat Commun.*, 13:745, 2022. doi: 10.1038/s41467-022-28242-7.
35. Lee Mulderrig, Juan I Garaycochea, Zewen K Tuong, Christopher L Millington, Felix A Dingler, John R Ferdinand, Liam Gaul, John A Tadross, Mark J Arends, Stephen O’Rahilly, Gerry P Crossan, Menna R Clatworthy, and Ketan J Patel. Aldehyde-driven transcriptional stress triggers an anorexic dna damage response. *Nature*, 600:158–163, 2021. doi: 10.1038/s41586-021-04133-7.
36. Si Wang, Zheyang Min, Qianzhao Ji, Lingling Geng, Yao Su, Zunpeng Liu, Huifang Hu, Lixia Wang, Weiqi Zhang, Keiichiro Suzuki, Yu Huang, Puyao Zhang, Tie-Shan Tang, Jing Qu, Yang Yu, Guang-Hui Liu, and Jie Qiao. Rescue of premature aging defects in cockayne syndrome stem cells by crispr/cas9-mediated gene correction. *Protein Cell*, 11:1–22, 2020. doi: 10.1007/s13238-019-0623-2.
37. Anita Lombardi, Lavinia Arseni, Roberta Carriero, Emmanuel Compe, Elena Botta, Debora Ferri, Martina Uggè, Giuseppe Biamonti, Fiorenzo A. Peverali, Silvia Bione, and et al. Reduced levels of prostaglandin i2 synthase specify the cancer-free trichothiodystrophy. *Proceedings of the National Academy of Sciences*, 118(26), 2021. doi: 10.1073/pnas.2024502118.
38. Marjolein J. Peters, Roby Joehanes, Luke C. Pilling, Claudia Schurmann, Karen N. Conneely, Joseph Powell, Eva Reinmaa, George L. Sutphin, Alexandra Zhernakova, Katharina Schramm, Yana A. Wilson, Sayuko Kobes, Taru Tukiainen, NABEC/UKBEC Consortium, Yolande F. Ramos, Harald H. H. Göring, Myriam Fornage, Yongmei Liu, Sina A. Gharib, Barbara E. Stranger, Philip L. De Jager, Abraham Aviv, Daniel Levy, Joanne M. Murabito, and Peter J. et al. Munson. The transcriptional landscape of age in human peripheral blood. *Nat Commun*, 6:8570, 2015. doi: 10.1038/ncomms9570.
39. Francesca Chiaromonte, Webb Miller, and Eric E Bouhassira. Gene length and proximity to neighbors affect genome-wide expression levels. *Genome Res.*, 13:2602–2608, 2003. doi: 10.1101/gr.1169203.
40. Patricia Heyn, Alex T Kalinka, Pavel Tomancak, and Karla M Neugebauer. Introns and gene expression: cellular constraints, transcriptional regulation, and evolutionary consequences. *Bioessays*, 37:148–154, 2015. doi: 10.1002/bies.201400138.

41. Killeen S Kirkconnell, Brian Magnuson, Michelle T Paulsen, Brian Lu, Karan Bedi, and Mats Ljungman. Gene length as a biological timer to establish temporal transcriptional regulation. *Cell Cycle*, 16:259–270, 2017. doi: 10.1080/15384101.2016.1234550.
42. Jay C Brown. Role of gene length in control of human gene expression: chromosome-specific and tissue-specific effects. *Int. J. Genomics*, 2021:8902428, 2021. doi: 10.1155/2021/8902428.
43. Patrick Cramer. Organization and regulation of gene transcription. *Nature*, 573:45–54, 2019. doi: 10.1038/s41586-019-1517-4.
44. Zheng Fan, Jennifer R Devlin, Simon J Hogg, Maria A Doyle, Paul F Harrison, Izabela Todorovski, Leonie A Cluse, Deborah A Knight, Jarrod J Sandow, Gareth Gregory, Andrew Fox, Traude H Beilharz, Nicholas Kwiatkowski, Nichollas E Scott, Ana Tufegdzc Vidakovic, Gavin P Kelly, Jesper Q Svejstrup, Matthias Geyer, Nathanael S Gray, Stephin J Vervoort, and Ricky W Johnstone. Cdk13 cooperates with cdk12 to control global rna polymerase ii processivity. *Sci Adv.*, 6:eaa5041, 2020. doi: 10.1126/sciadv.aaz5041.
45. Hanneke Vlaming, Claudia A Mimoso, Andrew R Field, Benjamin J E Martin, and Karen Adelman. Screening thousands of transcribed coding and non-coding regions reveals sequence determinants of rna polymerase ii elongation potential. *Nat Struct Mol Biol.*, 29:613–620, 2022. doi: 10.1038/s41594-022-00785-9.
46. Daisuke Kaida, Michael G Berg, Ihab Younis, Mumtaz Kasim, Larry N Singh, Lili Wan, and Gideon Dreyfuss. U1 snrnp protects pre-mrnas from premature cleavage and polyadenylation. *Nature*, 468:664–668, 2010. doi: 10.1038/nature09479.
47. Michael G Berg, Larry N Singh, Ihab Younis, Qiang Liu, Anna Maria Pinto, Daisuke Kaida, Zhenxi Zhang, Sungchan Cho, Scott Sherrill-Mix, Lili Wan, and Gideon Dreyfuss. U1 snrnp determines mrna length and regulates isoform expression. *Cell*, 150:53–64, 2012. doi: 10.1016/j.cell.2012.05.029.
48. Motoyasu Hosokawa, Akihide Takeuchi, Jun Tanihata, Kei Iida, Shin’ichi Takeda, and Masatoshi Hagiwara. Loss of rna-binding protein sfpq causes long-gene transcriptopathy in skeletal muscle and severe muscle mass reduction with metabolic myopathy. *iScience*, 13:229–242, 2019. doi: 10.1016/j.isci.2019.02.023.
49. Karan Bedi, Brian R Magnuson, Ishwarya Narayanan, Michelle Paulsen, Thomas E Wilson, and Mats Ljungman. Co-transcriptional splicing efficiencies differ within genes and between cell types. *RNA*, 27:829–840, 2021. doi: 10.1261/rna.078662.120.
50. Simona Cugusi, Richard Mitter, Gavin P Kelly, Jane Walker, Zhong Han, Paola Pisano, Michael Wierer, Aengus Stewart, and Jesper Q Svejstrup. Heat shock induces premature transcript termination and reconfigures the human transcriptome. *Molecular Cell*, 82:1573–1588, 2022. doi: 10.1016/j.molcel.2022.01.007.
51. Yuka Nakazawa, Yuichiro Hara, Yasuyoshi Oka, Okiru Komine, Diana van den Heuvel, Chaowan Guo, Yasukazu Daigaku, Mayu Isono, Yuxi He, Mayuko Shimada, Kana Kato, Nan Jia, Satoru Hashimoto, Yuko Kotani, Yuka Miyoshi, Miyako Tanaka, Akira Sobue, Norisato Mitsutake, Takayoshi Suganami, Akio Masuda, Kinji Ohno, Shinichiro Nakada, Tomoji Mashimo, Koji Yamanaka, Martijn S Luijsterburg, and Tomoo Ogi. Ubiquitination of dna damage-stalled rnapii promotes transcription-coupled repair. *Cell*, 180:1228–1244, 2020. doi: 10.1016/j.cell.2020.02.010.



52. Ana Tufegdi Vidakovi, Richard Mitter, Gavin P Kelly, Michelle Neumann, Michelle Harreman, Marta Rodríguez-Martínez, Anna Herlihy, Juston C Weems, Stefan Boeing, Vesela Encheva, Liam Gaul, Laura Milligan, David Tollervey, Ronald C Conaway, Joan W Conaway, Ambrosius P Snijders, Aengus Stewart, and Jesper Q Svejstrup. Regulation of the rnapii pool is integral to the dna damage response. *Cell*, 180:1245–1261, 2020. doi: 10.1016/j.cell.2020.02.009.
53. Shahar Barbash and Thomas P. Sakmar. Length-dependent gene misexpression is associated with alzheimers disease progression. *Scientific Reports*, 7:190, 2017. doi: 10.1038/s41598-017-00250-4.
54. Akihide Takeuchi, Kei Iida, Toshiaki Tsubota, Motoyasu Hosokawa, Masatsugu Denawa, J B Brown, Kensuke Ninomiya, Mikako Ito, Hiroshi Kimura, Takaya Abe, Hiroshi Kiyonari, Kinji Ohno, and Masatoshi Hagiwara. Loss of sfpq causes long-gene transcriptopathy in the brain. *Cell Reports*, 23(5):1326–1341, 2018. doi: 10.1016/j.celrep.2018.03.141.
55. Brunilda Balliu, Matthew Durrant, Olivia de Goede, Nathan Abell, Xin Li, Boxiang Liu, Michael J. Gloudemans, Naomi L. Cook, Kevin S. Smith, David A. Knowles, Mauro Pala, Francesco Cucca, David Schlessinger, Siddhartha Jaiswal, Chiara Sabatti, Lars Lind, Erik Ingelsson, and Stephen B. Montgomery. Genetic regulation of gene expression and splicing during a 10-year period of human aging. *Genome Biol.*, 20:230, 2019. doi: 10.1186/s13059-019-1840-y.
56. Lorna W Harries, Dena Hernandez, William Henley, Andrew R Wood, Alice C Holly, Rachel M Bradley-Smith, Hanieh Yaghootkar, Ambarish Dutta, Anna Murray, Timothy M Frayling, Jack M Guralnik, Stefania Bandinelli, Andrew Singleton, Luigi Ferrucci, and David Melzer. Human aging is characterized by focused changes in gene expression and deregulation of alternative splicing. *Aging Cell*, 10:868–878, 2011. doi: 10.1111/j.1474-9726.2011.00726.x.
57. Michael A Lodato, Rachel E Rodin, Craig L Bohrson, Michael E Coulter, Alison R Barton, Minseok Kwon, Maxwell A Sherman, Carl M Vitzthum, Lovelace J Luquette, Chandri N Yandava, Pengwei Yang, Thomas W Chittenden, Nicole E Hatem, Steven C Ryu, Mollie B Woodworth, Peter J Park, and Christopher A Walsh. Aging and neurodegeneration are associated with increased mutations in single human neurons. *Science*, 359:555–559, 2018. doi: 10.1126/science.aao4426.
58. Emily Mitchell, Michael Spencer Chapman, Nicholas Williams, Kevin J Dawson, Nicole Mende, Emily F Calderbank, Hyunchul Jung, Thomas Mitchell, Tim H H Coorens, David H Spencer, Heather Machado, Henry Lee-Six, Megan Davies, Daniel Hayler, Margarete A Fabre, Krishnaa Mahbubani, Federico Abascal, Alex Cagan, George S Vassiliou, Joanna Baxter, Inigo Martincorena, Michael R Stratton, David G Kent, Krishna Chatterjee, Kourosh Saeb Parsy, Anthony R Green, Jyoti Nangalia, Elisa Laurenti, and Peter J Campbell. Clonal dynamics of haematopoiesis across the human lifespan. *Nature*, 606:343–350, 2022. doi: 10.1038/s41586-022-04786-y.
59. Jiena Liu, Zhenzhen Wu, Jin He, and Yuming Wang. Cellular fractionation reveals transcriptome responses of human fibroblasts to uv-c irradiation. *Cell Death Dis.*, 13:177, 2022. doi: 10.1038/s41419-022-04634-x.
60. Gustavo Satoru Kajitani, Livia Luz de Souza Nascimento, Maira Rodrigues de Camargo Neves, Giovana da Silva Leandro, Camila Carrião Machado Garcia, and Carlos Frederico Martins Menck. Transcription blockage by dna damage in nucleotide excision repair-related neurological dysfunctions. *Semin Cell Dev Biol.*, 114:20–35, 2021. doi: 10.1016/j.semdb.2020.10.009.

61. F. A. Wolf, Angerer P., and F. J. Theis. Scanpy: large-scale single-cell gene expression data analysis. *Genome Biology*, 2018. doi: <https://doi.org/10.1186/s13059-017-1382-0>.
62. M. Alex Ascensión, Olga Ibáñez-Solé, Iñaki Inza, Ander Izeta, and Marcos J Araúzo-Bravo. Triku: A feature selection method based on nearest neighbors for single-cell data. *GigaScience*, 11, 2022. doi: [10.1093/gigascience/giac017](https://doi.org/10.1093/gigascience/giac017).
63. Leland McInnes, John Healy, Nathaniel Saul, and Lukas GroSSberger. Umap: Uniform manifold approximation and projection. *Journal of Open Source Software*, 3(29):861, 2018. doi: [10.21105/joss.00861](https://doi.org/10.21105/joss.00861).
64. V. A. Traag, L. Waltman, and N. J. van Eck. From louvain to leiden: guaranteeing well-connected communities. *Scientific Reports*, 9, 2019. doi: <https://doi.org/10.1038/s41598-019-41695-z>.
65. Olga Ibáñez-Solé, Alex M. Ascensión, Marcos J. Araúzo-Bravo, and Ander Izeta. Lack of evidence for increased transcriptional noise in aged tissues. *bioRxiv*, 2022. doi: [10.1101/2022.05.18.492432](https://doi.org/10.1101/2022.05.18.492432).
66. Simon Joost, Amit Zeisel, Tina Jacob, Xiaoyan Sun, Gioele La Manno, Peter Lönnerberg, Sten Linnarsson, and Maria Kasper. Single-cell transcriptomics reveals that differentiation and spatial signatures shape epidermal and hair follicle heterogeneity. *Cell Systems*, 3(3), 2016. doi: [10.1016/j.cels.2016.08.010](https://doi.org/10.1016/j.cels.2016.08.010).
67. Hubert W. Lilliefors. On the kolmogorov-smirnov test for normality with mean and variance unknown. *Journal of the American Statistical Association*, 62(318):399–402, 1967. doi: [10.1080/01621459.1967.10482916](https://doi.org/10.1080/01621459.1967.10482916).

## Acknowledgements

We thank Irantzu Barrio for her support with the statistical analysis on gene length-dependent age-related transcriptional decay. We also thank Alex M. Ascensión, Javier Cabau-Laporta, Laura Yndriago, Sonia Alonso-Martin, Ander Matheu and David Otaegui for their thorough revision of the manuscript and for useful suggestions. This work was supported by grants from Instituto de Salud Carlos III (PI19/01621), cofunded by the European Union (European Regional Development Fund/European Science Foundation, Investing in your future), Diputación Foral de Gipuzkoa. OI-S received the support of a fellowship from la Caixa Foundation (ID 100010434; code LCF/BQ/IN18/11660065), and from the European Union's Horizon 2020 research and innovation programme under the Marie Skłodowska-Curie grant agreement No. 713673.

## Author contributions

OI-S conceived and performed the experiments. AI conceived some experiments and supervised the work. Both authors wrote the manuscript.

## Competing interests

The authors declare no competing interests.

## Supplementary Figures

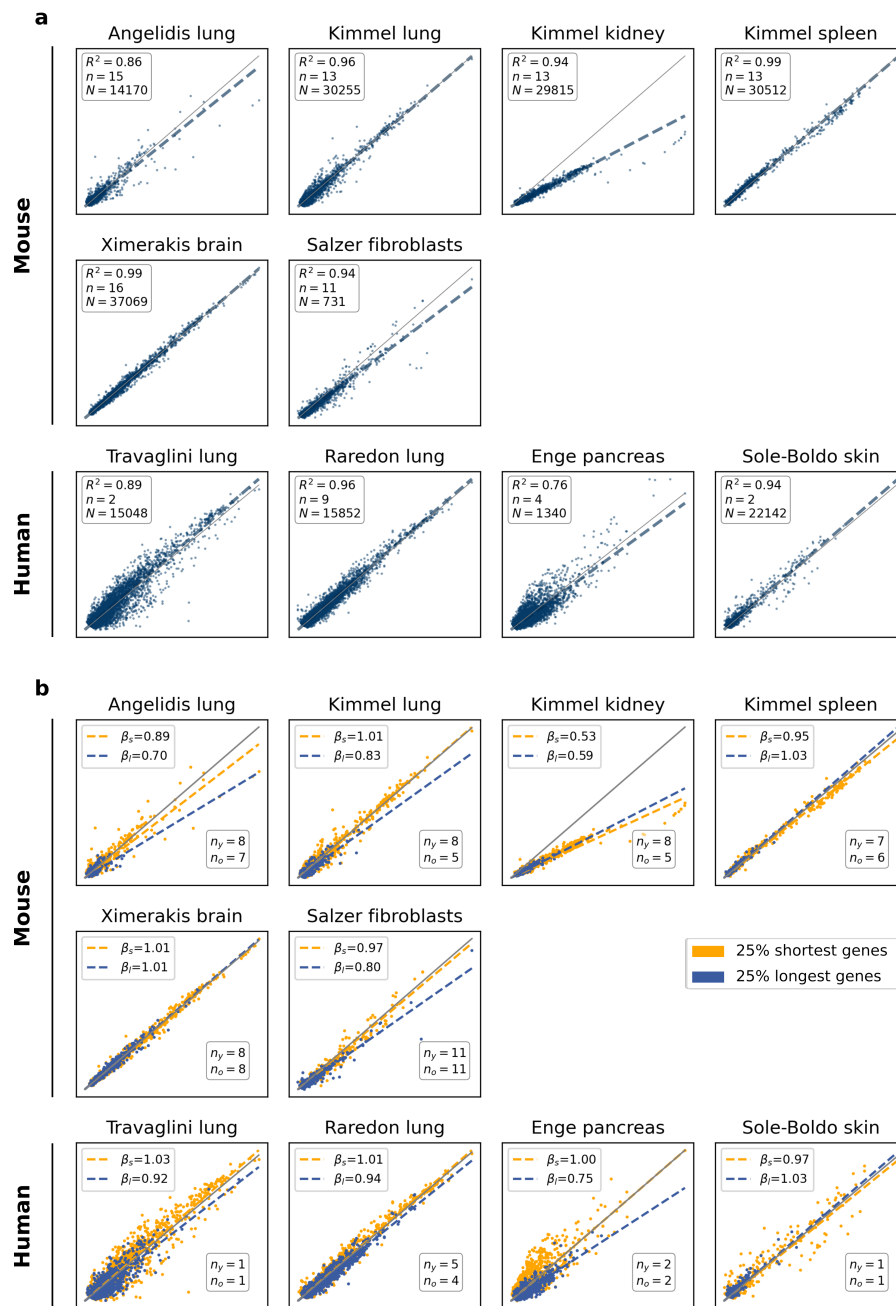

**Figure S1. Downregulation of long genes with aging is replicated in several datasets of different species.** **a**, Gene expression is conserved with aging in several datasets of different species. Average gene expression in old against young cells in six mouse and four human datasets of several tissues.  $R^2$ : coefficient of determination;  $N$ : total number of cells;  $n$ : number of biological replicates. **b**, Age-associated shutdown of transcription is found to be gene length-dependent in several datasets of different species. Slopes of the straight lines that fit the data for the 25% shortest ( $\beta_s$ ) and the 25% longest genes ( $\beta_l$ ). Number of biological replicates in each age category: young ( $n_y$ ) and old ( $n_o$ ).

## Supplementary Tables

|               | 25% shortest (Q1) |              |           | 25% longest (Q4) |             |           |
|---------------|-------------------|--------------|-----------|------------------|-------------|-----------|
|               | short_min         | short_median | short_max | long_min         | long_median | long_max  |
| Bladder       | 65                | 5,373        | 10,218    | 58,647           | 104,278     | 2,270,723 |
| Brain         | 63                | 5,402        | 10,143    | 52,003           | 93,157      | 1,211,426 |
| Brain myeloid | 69                | 5,521        | 10,418    | 57,559           | 103,285     | 2,257,271 |
| Heart         | 69                | 5,196        | 9,713     | 52,057           | 95,055      | 2,270,723 |
| Kidney        | 63                | 5,402        | 9,905     | 49,274           | 88,337      | 1,503,513 |
| Liver         | 108               | 5,494        | 10,367    | 56,554           | 101,606     | 2,960,898 |
| Lung          | 63                | 5,574        | 10,615    | 59,384           | 108,898     | 2,960,898 |
| Muscle        | 64                | 5,897        | 11,150    | 63,517           | 118,298     | 2,960,898 |
| Pancreas      | 67                | 5,526        | 10,471    | 55,760           | 100,580     | 2,960,898 |
| Skin          | 63                | 5,411        | 10,151    | 56,744           | 101,808     | 2,960,898 |
| Spleen        | 63                | 5,379        | 9,987     | 50,379           | 89,933      | 1,503,513 |
| Thymus        | 63                | 5,538        | 10,287    | 54,303           | 99,058      | 2,960,898 |

**Table S1.** Length of the Q1 (25% shortest) and Q4 (25% longest) genes used in the analysis of Figure 1. The minimum, median and maximum gene lengths (bp) are shown for the two gene categories.

|               | Q1           |       | Q1-Q2        |          | Q1-Q3        |          | Q1-Q4        |        |
|---------------|--------------|-------|--------------|----------|--------------|----------|--------------|--------|
|               | Est. (SE)    | p-val | Est. (SE)    | p-val    | Est. (SE)    | p-val    | Est. (SE)    | p-val  |
| Bladder       | 1.02 (<0.01) | 0     | -0.03 (0.01) | <0.001   | -0.05 (0.01) | <0.001   | -0.07 (0.01) | <0.001 |
| Brain         | 0.86 (<0.01) | 0     | -0.25 (0.01) | <0.001   | -0.35 (0.01) | <0.001   | -0.43 (0.01) | <0.001 |
| Brain myeloid | 1.03 (<0.01) | 0     | -0.06 (0.01) | <0.001   | -0.11 (0.01) | <0.001   | -0.29 (0.01) | <0.001 |
| Heart         | 1.02 (<0.01) | 0     | -0.09 (0.01) | <0.001   | -0.17 (0.01) | <0.001   | -0.28 (0.01) | <0.001 |
| Kidney        | 0.93 (<0.01) | 0     | -0.03 (0.01) | 3.85E-02 | -0.08 (0.02) | <0.001   | -0.19 (0.02) | <0.001 |
| Liver         | 0.86 (<0.01) | 0     | -0.06 (0.01) | <0.001   | -0.08 (0.01) | <0.001   | -0.20 (0.02) | <0.001 |
| Lung          | 1.16 (0.01)  | 0     | -0.24 (0.02) | <0.001   | -0.39 (0.02) | <0.001   | -0.50 (0.02) | <0.001 |
| Muscle        | 1.26 (0.01)  | 0     | -0.36 (0.02) | <0.001   | -0.50 (0.02) | <0.001   | -0.62 (0.02) | <0.001 |
| Pancreas      | 0.85 (<0.01) | 0     | -0.03 (0.01) | 2.83E-02 | -0.06 (0.01) | <0.001   | -0.14 (0.01) | <0.001 |
| Skin          | 1.09 (<0.01) | 0     | -0.13 (0.01) | <0.001   | -0.21 (0.01) | <0.001   | -0.29 (0.01) | <0.001 |
| Spleen        | 0.99 (<0.01) | 0     | 0.05 (0.01)  | <0.001   | -0.03 (0.01) | 3.80E-02 | -0.19 (0.01) | <0.001 |
| Thymus        | 1.02 (<0.01) | 0     | -0.13 (0.02) | <0.001   | -0.25 (0.02) | <0.001   | -0.41 (0.02) | <0.001 |

**Table S2. Linear models fit on short and long genes are significantly different in 12 murine aging mouse datasets.** We test for the difference between the slope that best fits the old *vs* young average gene expression using the Q1 genes (25% shortest) and the slope that corresponds to each of the other three quartiles (Q2, Q3, Q4). Q1-Q2, Q1-Q3 and Q1-Q4 represent the differences between the slopes fitted on Q1 and each of the quartiles. Est. (estimate), SE (standard error), p-val (p-value).

|               | U statistic | p-value  |
|---------------|-------------|----------|
| Bladder       | 28948.5     | 5.23e-10 |
| Brain         | 27401.0     | 2.52e-10 |
| Brain myeloid | 13075.0     | 1.45e-43 |
| Heart         | 12005.5     | 5.54e-45 |
| Kidney        | 22024.0     | 9.91e-21 |
| Liver         | 31636.0     | 0.000227 |
| Lung          | 10844.0     | 7.16e-52 |
| Muscle        | 8774.5      | 7.31e-59 |
| Pancreas      | 25380.0     | 6.00e-12 |
| Skin          | 12953.5     | 1.35e-44 |
| Spleen        | 19386.0     | 5.45e-25 |
| Thymus        | 10888.5     | 1.97e-50 |

**Table S3. Mann-Whitney test comparing lengths of DEG between young and old cells** U statistic and p-value associated with each comparison. The test compares the mean  $\log_{10}$  gene length (bp) of the top 300 DEGs between young and old cells in 12 murine tissues (shown in Figure 2).

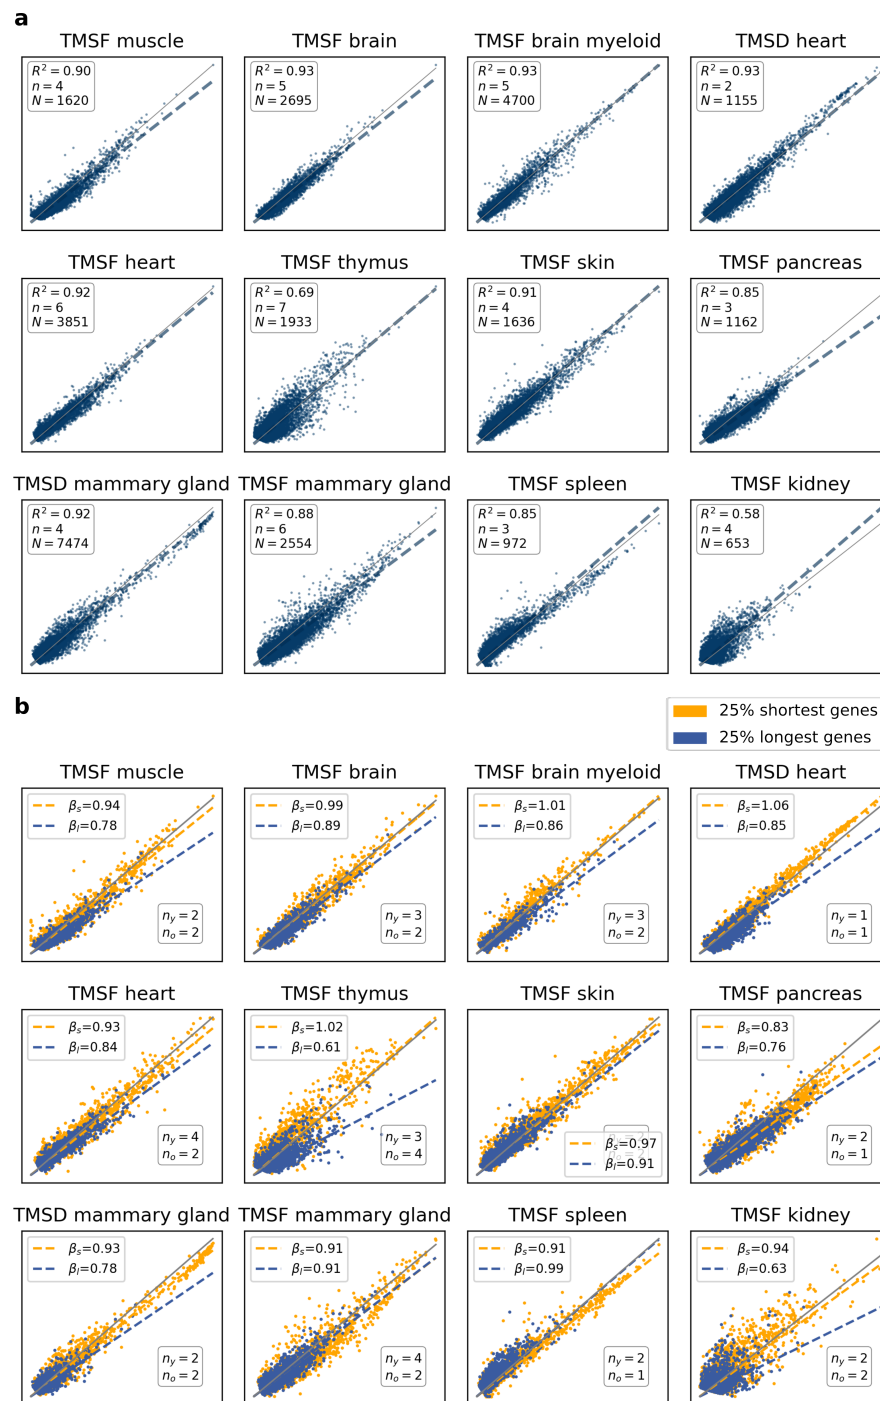

**Figure S2. Age-associated shutdown of transcription is also detected in 18 month-old females.** **a**, Gene expression is highly conserved but shows a detectable decay with aging in 18 month old female mice as well. Scatter plots showing the average gene expression in 18-month old female mice against average gene expression in 3 month-old female mice in 12 tissues from the *TMS FACS* and the *TMS droplet* datasets [17]. Each dot represents a gene.  $N$ : number of single cells;  $n$ : number of biological replicates.  $R^2$ : coefficient of determination. **b**, Age-associated shutdown of transcription preferentially affects long genes. The scatter plots show the average gene expression in 18 month-old versus in 3 month-old female mice. The top 25% and bottom 25% of the total genes according to their gene length are shown in blue and yellow, respectively.  $\beta_s$  and  $\beta_l$  represent the slopes of the straight lines that best fit the data points corresponding to *short* and *long* genes, respectively. Number of young ( $n_y$ ) and old ( $n_o$ ) biological replicates.

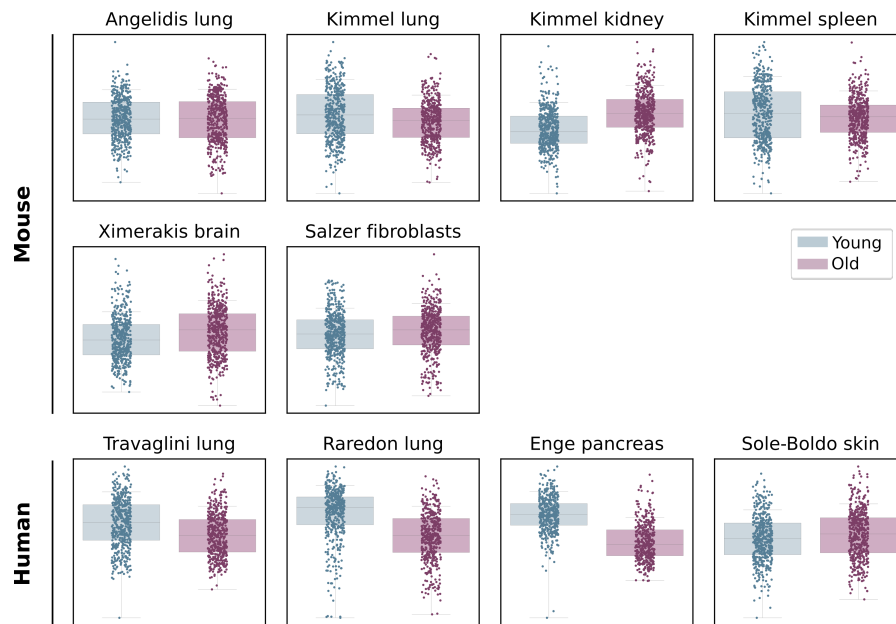

**Figure S3. Downregulation of long genes is found in several datasets of different species.** Top 300 DEGs between young and old cells in 10 independent aging datasets from mouse and human. The 300 differentially expressed genes between young and old individuals were obtained using the Wilcoxon method.

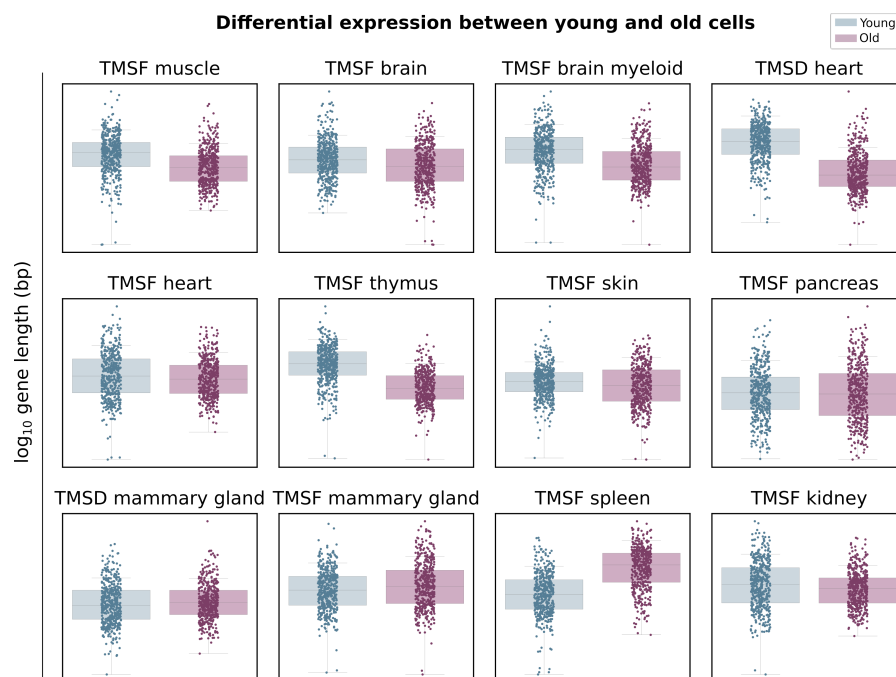

**Figure S4. Downregulation of long genes is also detected in 18 month-old females.** Top 300 DEGs between young and old cells in 12 aging datasets from the Tabula Muris Senis. The 300 differentially expressed genes between 3 months old and 18 months old female mice were obtained using the Wilcoxon method.



|                 |               | Q1           |       | Q1-Q2         |          | Q1-Q4         |          | Q1-Q4        |        |
|-----------------|---------------|--------------|-------|---------------|----------|---------------|----------|--------------|--------|
|                 |               | Est. (SE)    | p-val | Est. (SE)     | p-val    | Est. (SE)     | p-val    | Est. (SE)    | p-val  |
| <b>Lin</b>      | H vs UV       | 0.91 (<0.01) | 0     | -0.07 (<0.01) | <0.001   | -0.10 (0.01)  | <0.001   | -0.11 (0.01) | <0.001 |
|                 | VD vs UV      | 0.91 (<0.01) | 0     | -0.08 (<0.01) | <0.001   | -0.10 (0.01)  | <0.001   | -0.13 (0.01) | <0.001 |
| <b>Goldfar.</b> | H vs VD       | 0.98 (<0.01) | 0     | 0.01 (<0.01)  | 0.392    | -0.01 (0.01)  | 0.201    | 0.00 (0.01)  | 0.903  |
|                 | H vs Smoker   | 1.01 (<0.01) | 0     | -0.03 (<0.01) | <0.001   | -0.06 (0.01)  | <0.001   | -0.12 (0.01) | <0.001 |
| <b>Mulder.</b>  | WT vs ADH5KO  | 1.00 (<0.01) | 0     | 0.02 (<0.01)  | <0.001   | 0.01 (0.01)   | 0.171    | 0.01 (0.01)  | 0.0969 |
|                 | WT vs CSBKO   | 1.00 (<0.01) | 0     | 0.03 (<0.01)  | <0.001   | 0.03 (<0.01)  | <0.001   | 0.04 (0.01)  | <0.001 |
| <b>Wang</b>     | WT vs DKO     | 0.99 (<0.01) | 0     | -0.02 (<0.01) | 4.68E-03 | -0.05 (0.01)  | <0.001   | -0.06 (0.01) | <0.001 |
|                 | GC: ct vs UV  | 0.94 (<0.01) | 0     | 0.00 (<0.01)  | 0.691    | 0.01 (0.01)   | 9.30E-03 | 0.00 (0.01)  | 0.893  |
|                 | mut: ct vs UV | 0.94 (<0.01) | 0     | -0.04 (<0.01) | <0.001   | -0.07 (0.01)  | <0.001   | -0.10 (0.01) | <0.001 |
|                 | ct: GC vs mut | 0.97 (<0.01) | 0     | 0.02 (<0.01)  | <0.001   | 0.02 (<0.01)  | <0.001   | 0.00 (<0.01) | 0.958  |
|                 | UV: GC vs mut | 0.99 (<0.01) | 0     | -0.03 (<0.01) | <0.001   | -0.08 (<0.01) | <0.001   | -0.12 (0.01) | <0.001 |

**Table S4.** Statistical significance of the analyses done on premature aging datasets.

|                      | Q1          |        | Q1-Q2        |         | Q1-Q3        |        | Q1-Q3        |        |
|----------------------|-------------|--------|--------------|---------|--------------|--------|--------------|--------|
|                      | Est. (SE)   | p-val  | Est. (SE)    | p-val   | Est. (SE)    | p-val  | Est. (SE)    | p-val  |
| <b>TMSD F (3-18)</b> | 1.06 (0.00) | <0.001 | -0.07 (0.01) | <0.001  | -0.14 (0.01) | <0.001 | -0.21 (0.01) | <0.001 |
| <b>TMSD F (3-21)</b> | 1.06 (0.00) | <0.001 | -0.04 (0.01) | <0.001  | -0.12 (0.01) | <0.001 | -0.22 (0.01) | <0.001 |
| <b>TMSD M (1-18)</b> | 0.97 (0.00) | <0.001 | -0.04 (0.01) | <0.001  | -0.05 (0.01) | <0.001 | -0.09 (0.01) | <0.001 |
| <b>TMSD M (1-24)</b> | 0.98 (0.00) | <0.001 | -0.03 (0.01) | <0.001  | -0.04 (0.01) | <0.001 | -0.07 (0.01) | <0.001 |
| <b>TMSF F (3-18)</b> | 0.93 (0.00) | <0.001 | -0.01 (0.01) | 7.84E-2 | -0.05 (0.01) | <0.001 | -0.09 (0.01) | <0.001 |
| <b>TMSF M (3-24)</b> | 1.02 (0.01) | <0.001 | -0.09 (0.01) | <0.001  | -0.17 (0.01) | <0.001 | -0.28 (0.01) | <0.001 |

**Table S5.** Output of the statistical analysis comparing the effects of the different gene length groups based on a linear model with interaction. We test for the difference between the slope that best fits the old *vs* young average gene expression using the Q1 genes (25% shortest) and the slope that corresponds to each of the other three quartiles (Q2, Q3, Q4). Q1-Q2, Q1-Q3 and Q1-Q4 represent the differences between the slopes fitted on Q1 and each of the quartiles.
